# Supplementary material
Source: Preprints.org preprint supplement (doi:10.20944/preprints202003.0005.v2)

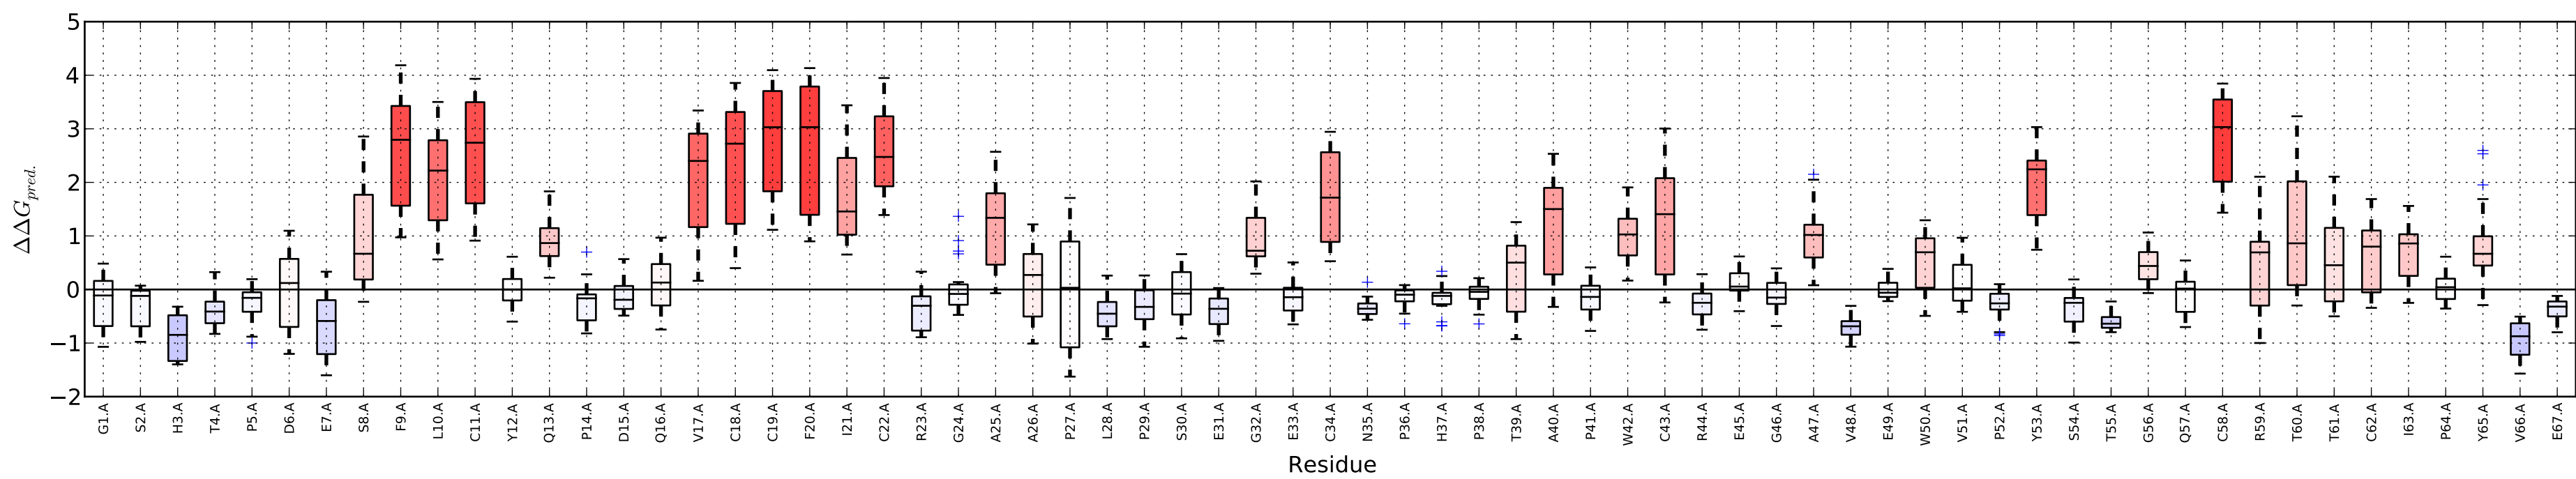

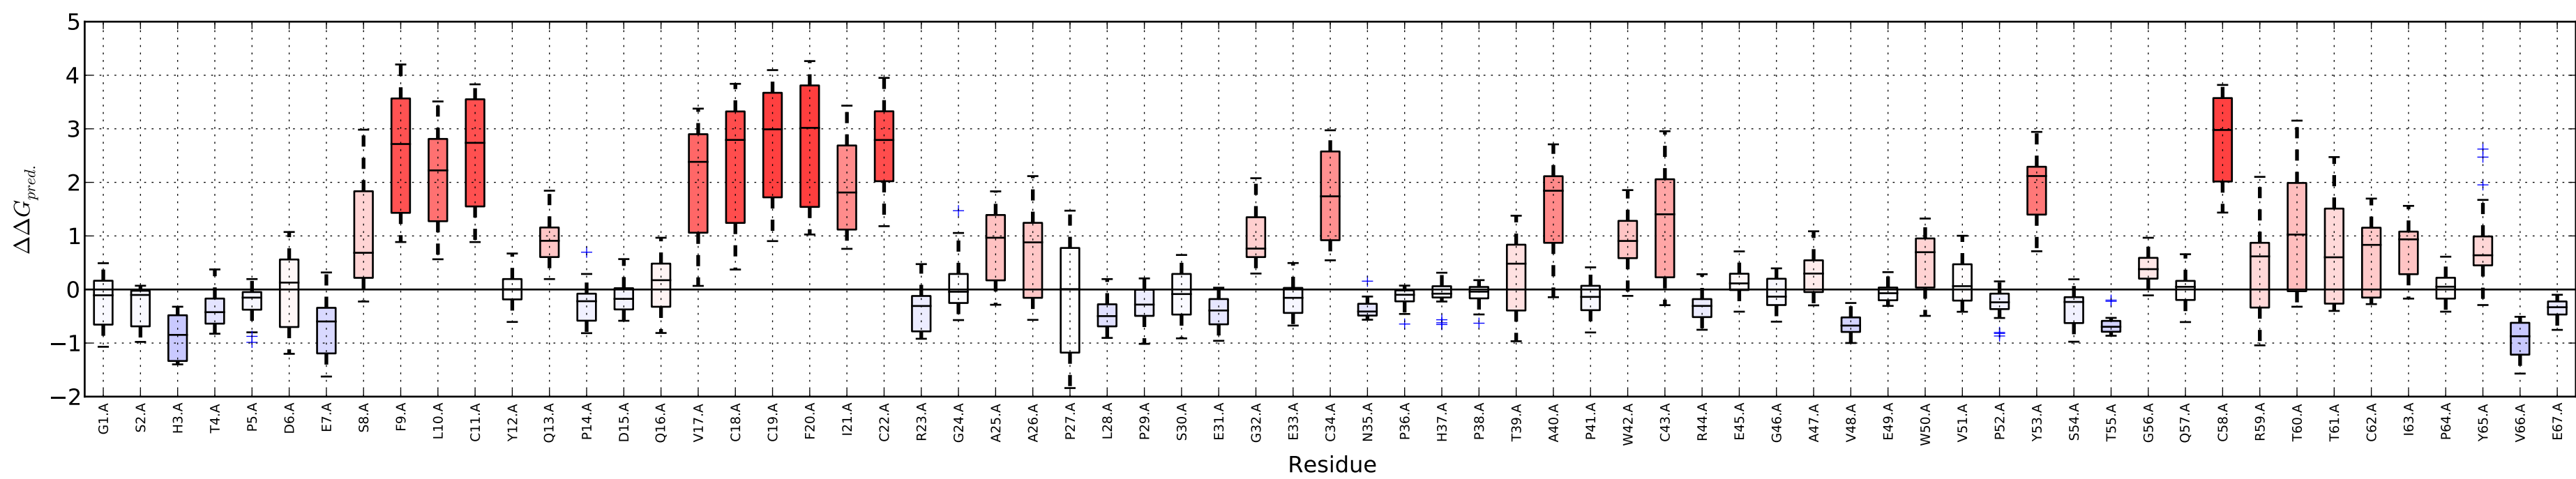

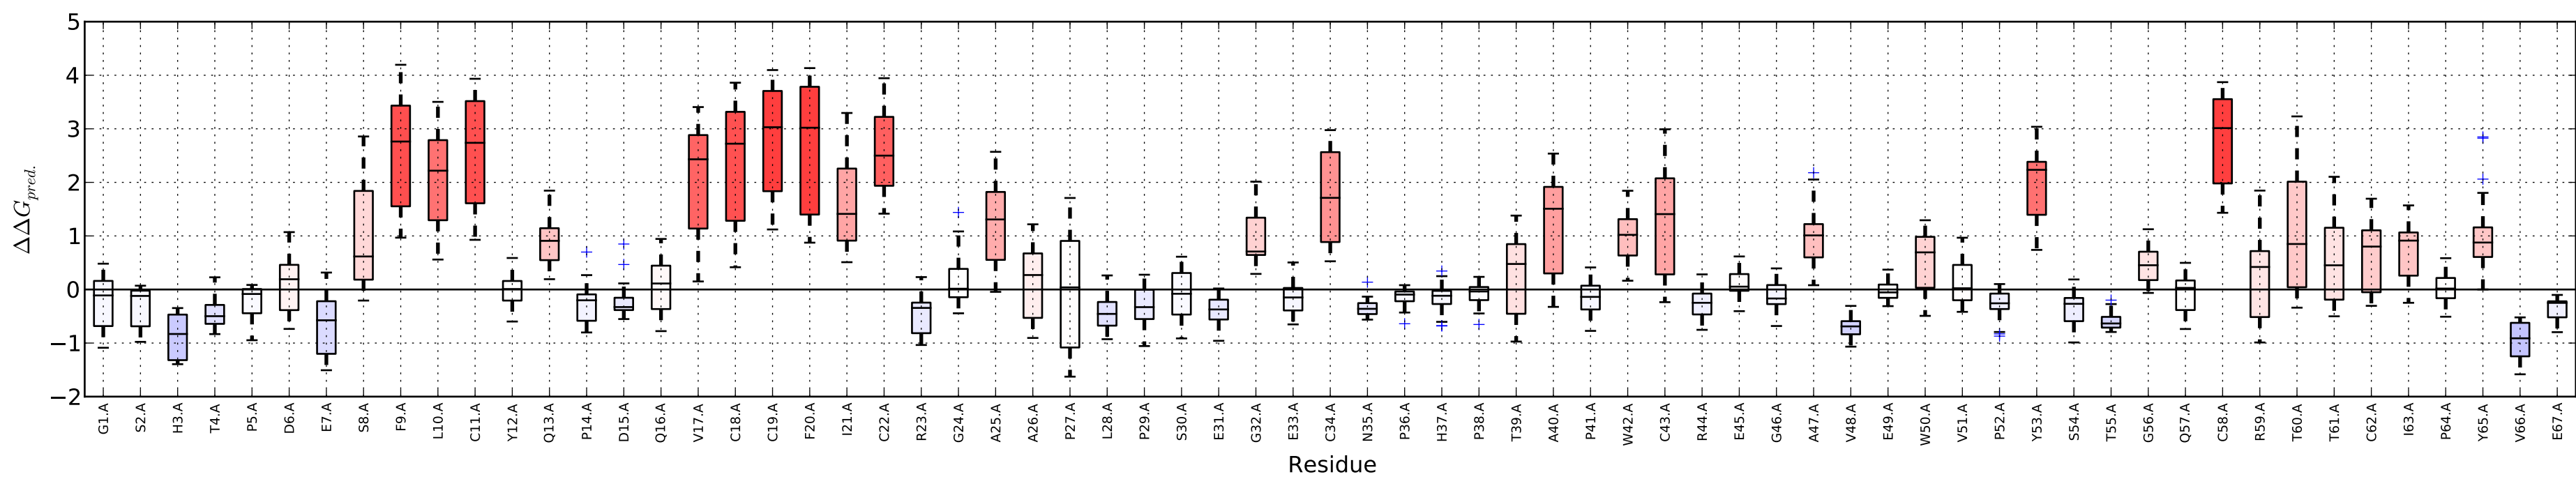

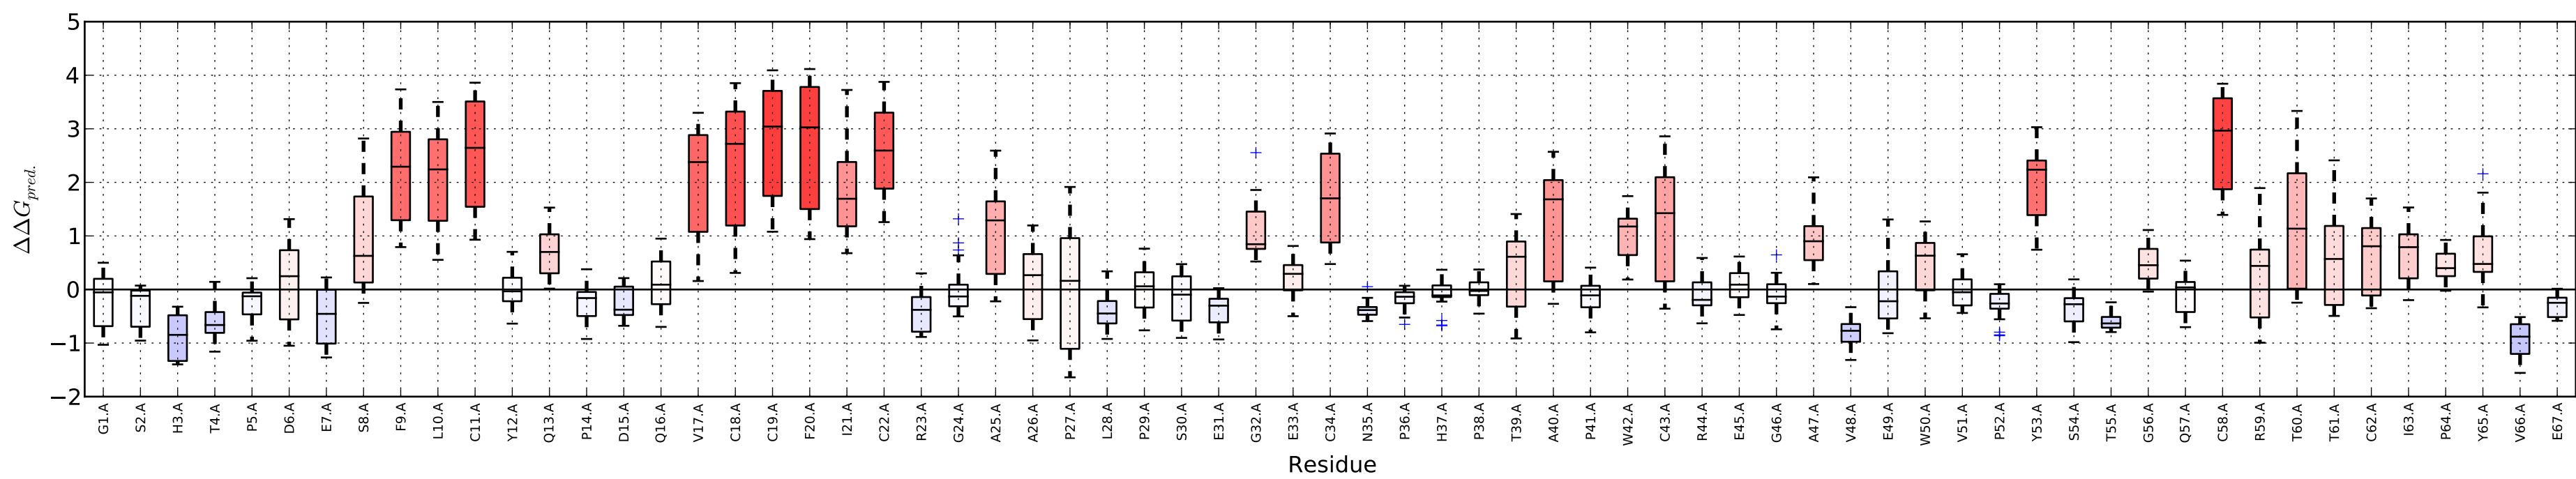

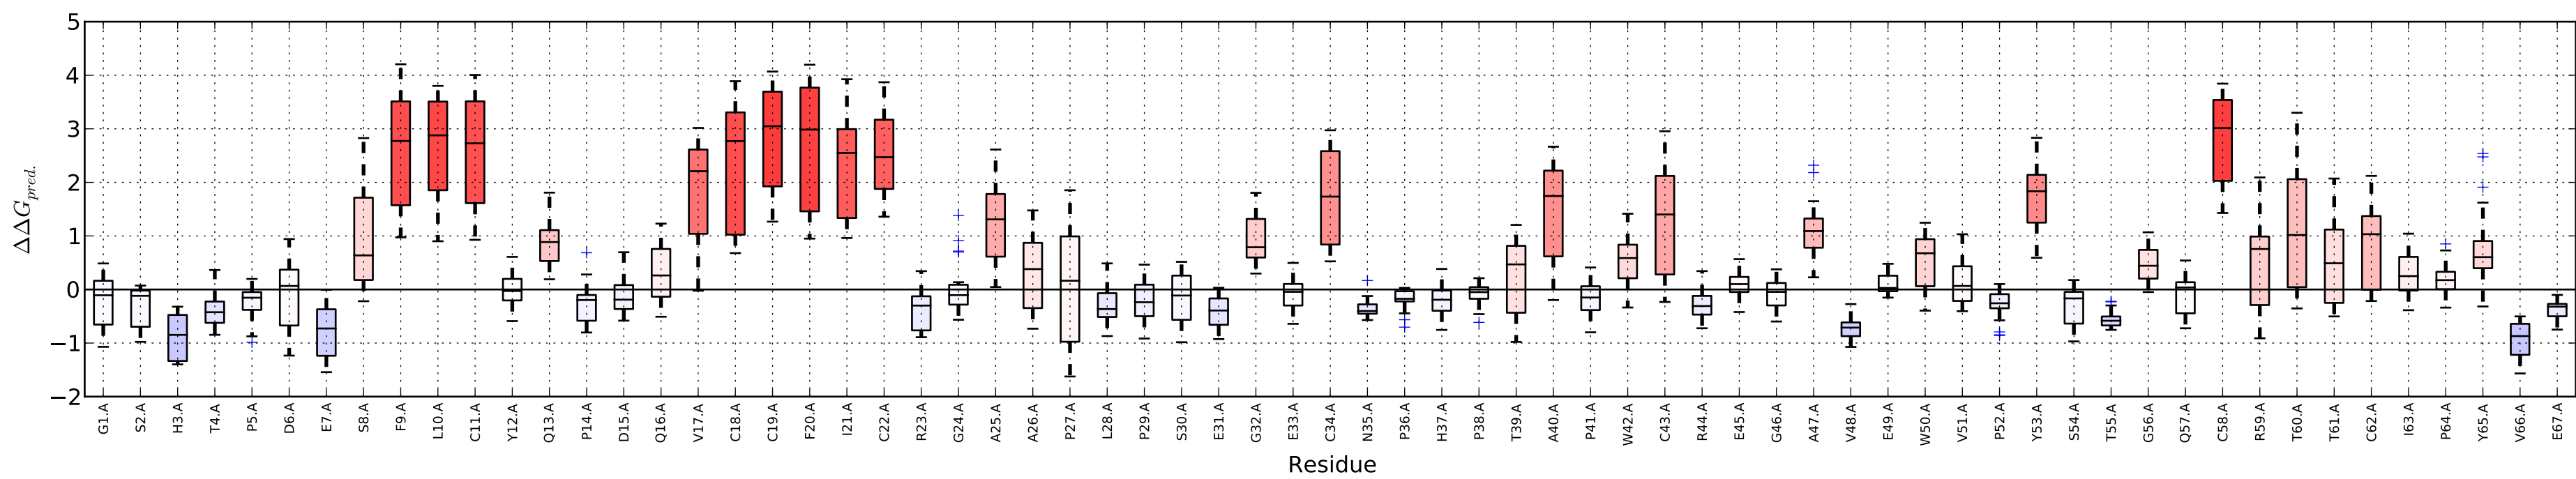



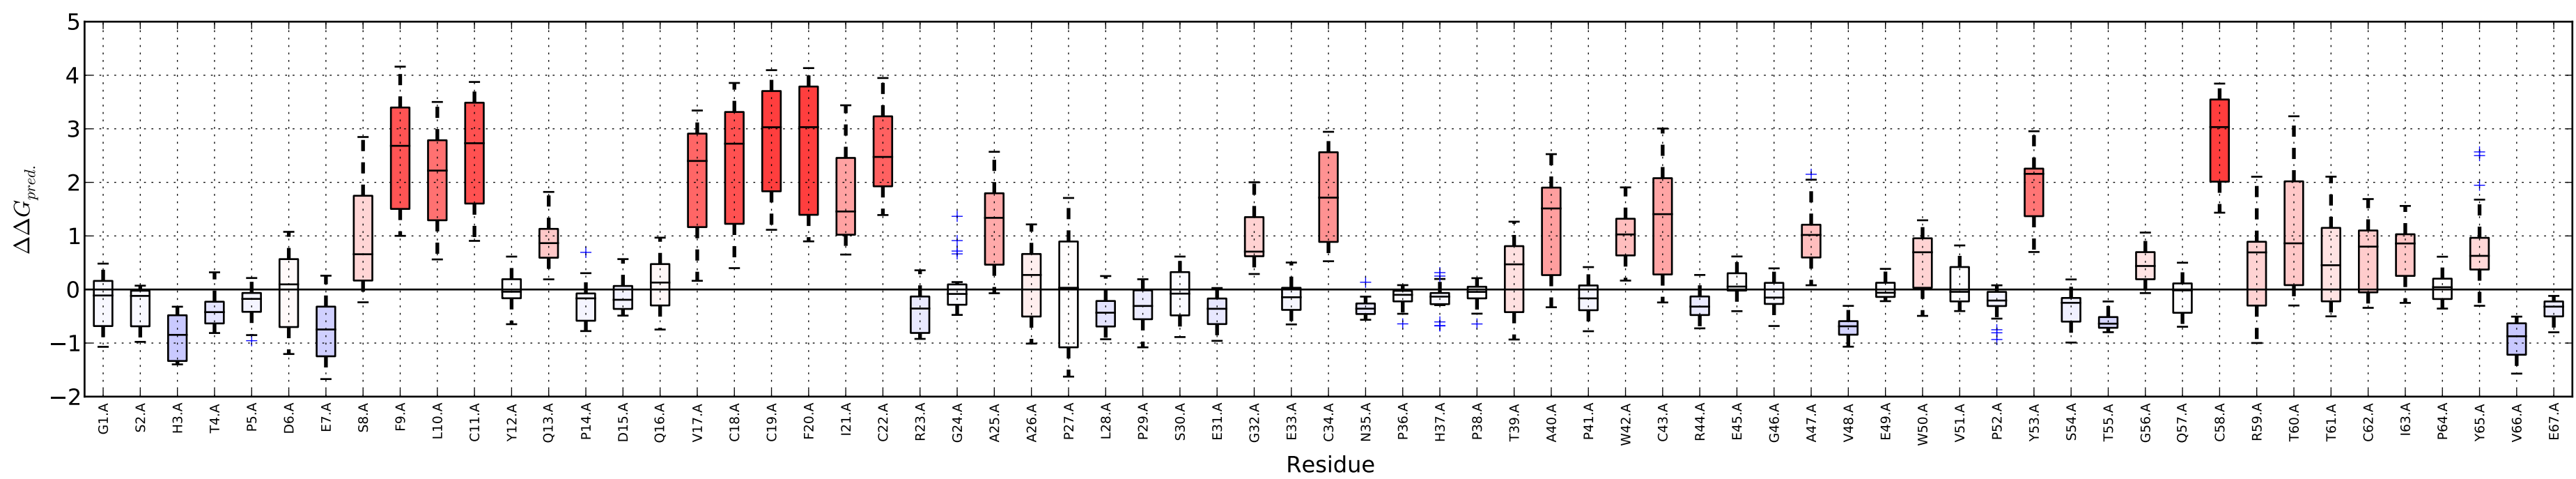

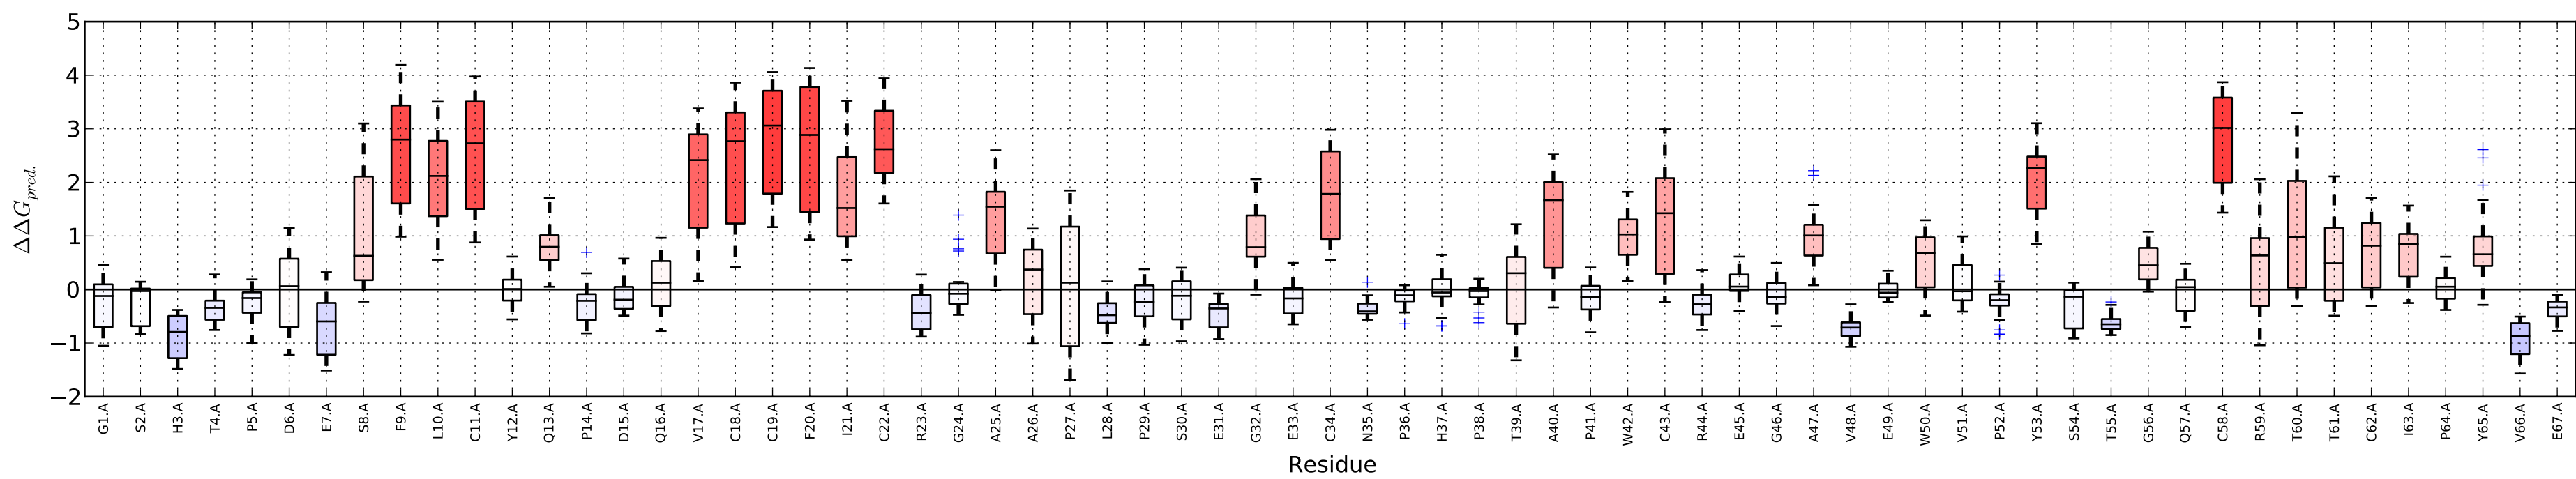



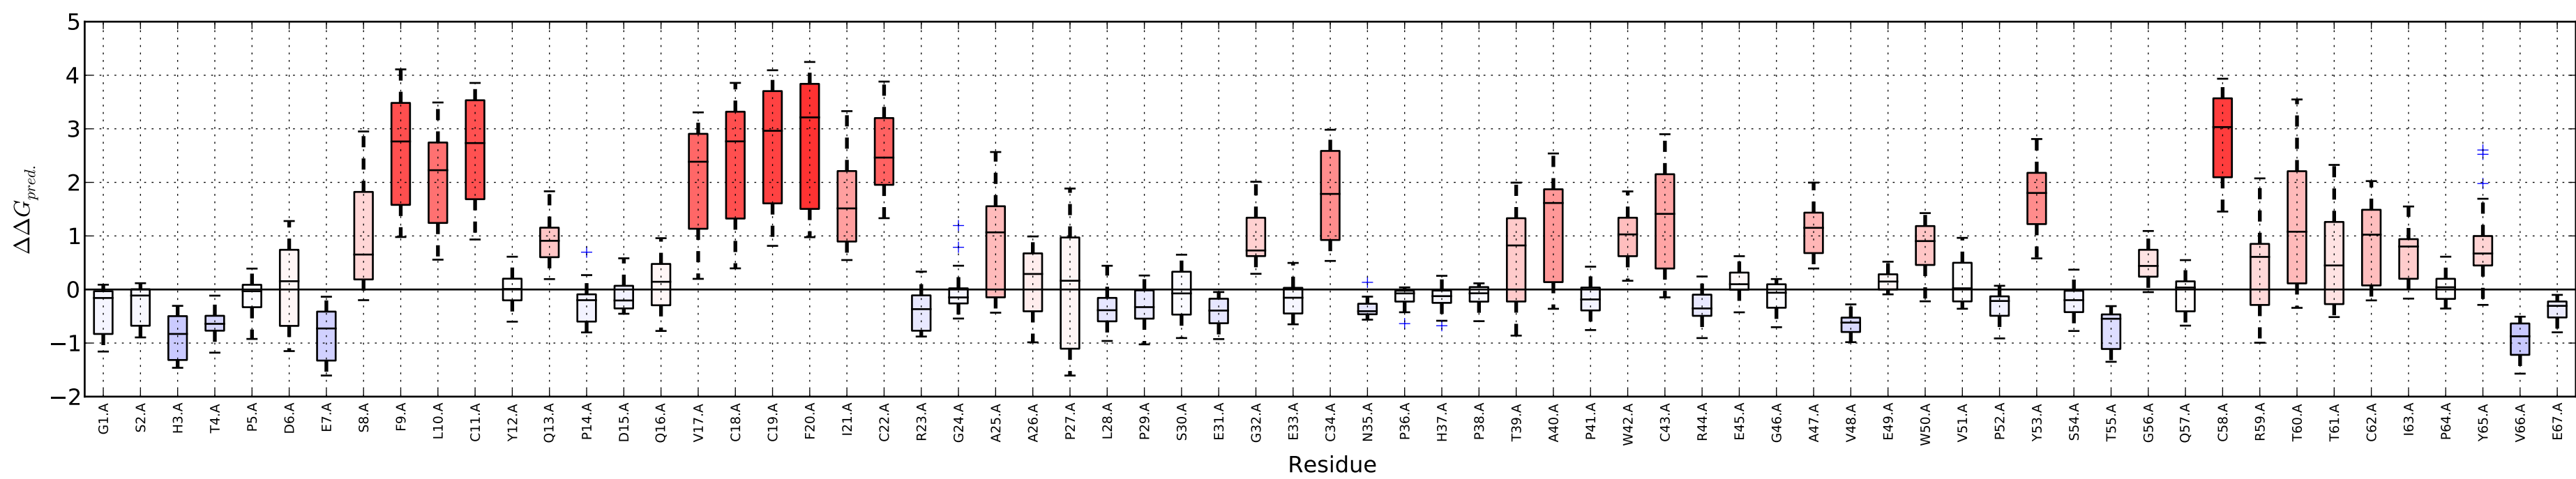

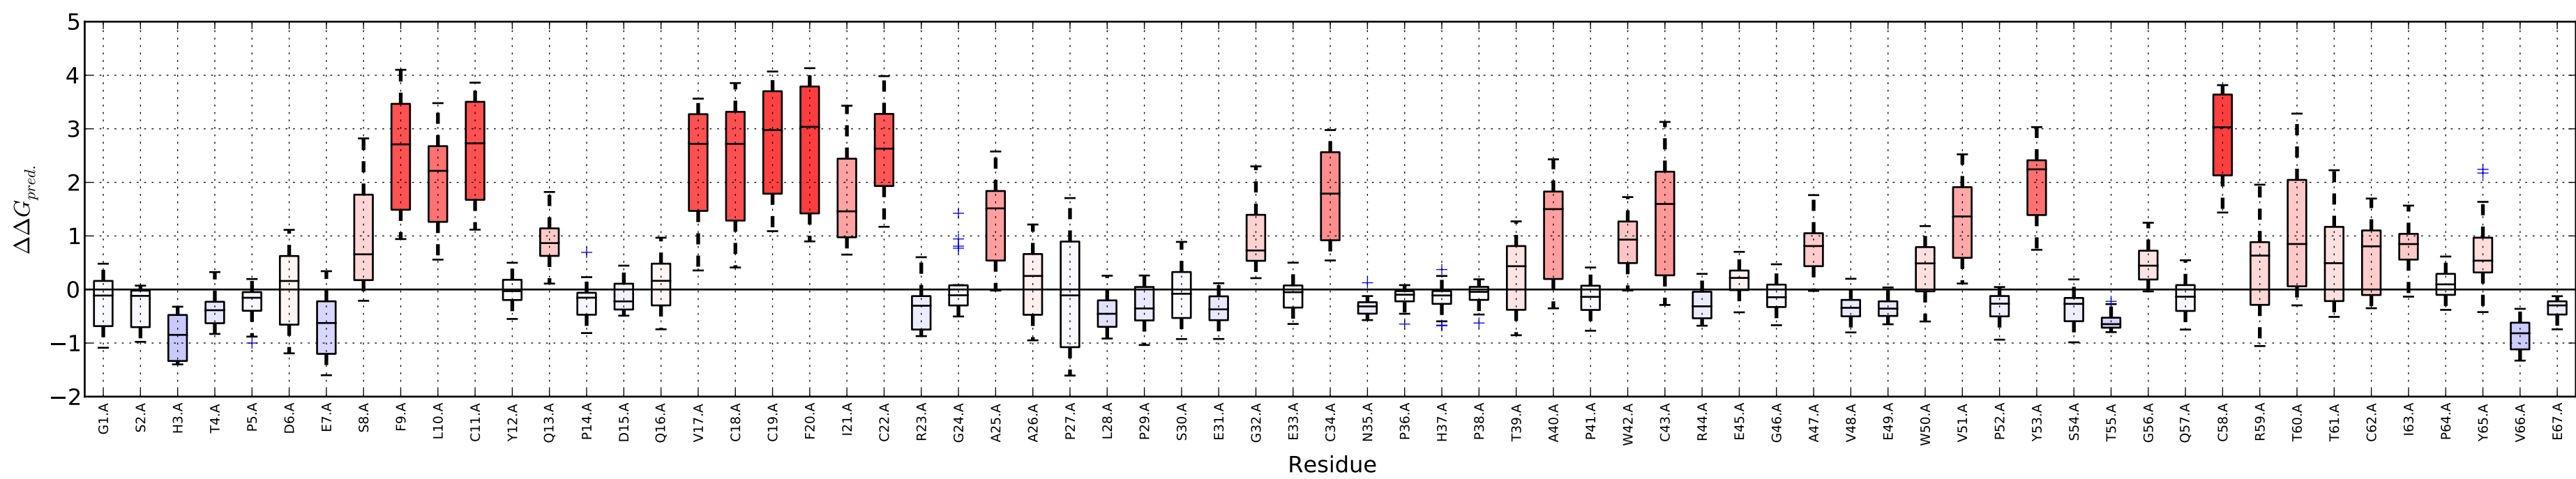

Supplement: Supplementary file 1 [file supplementary]

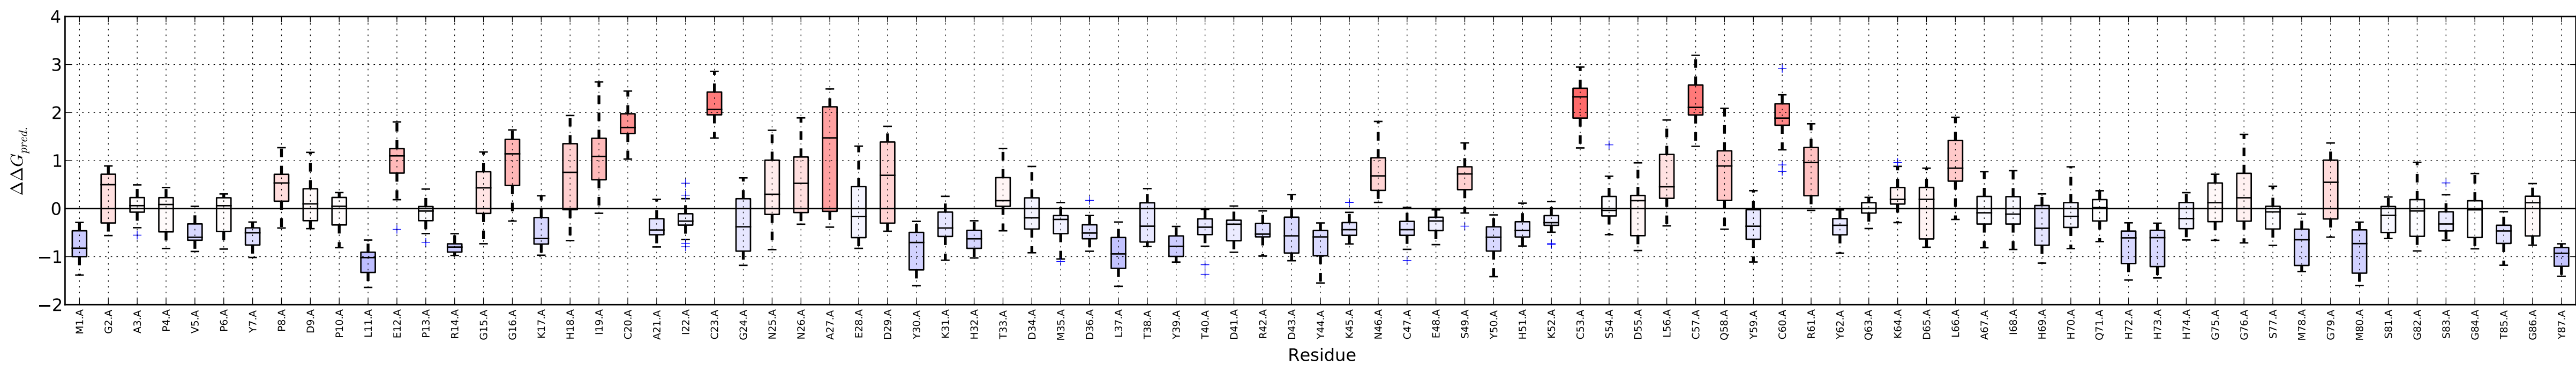

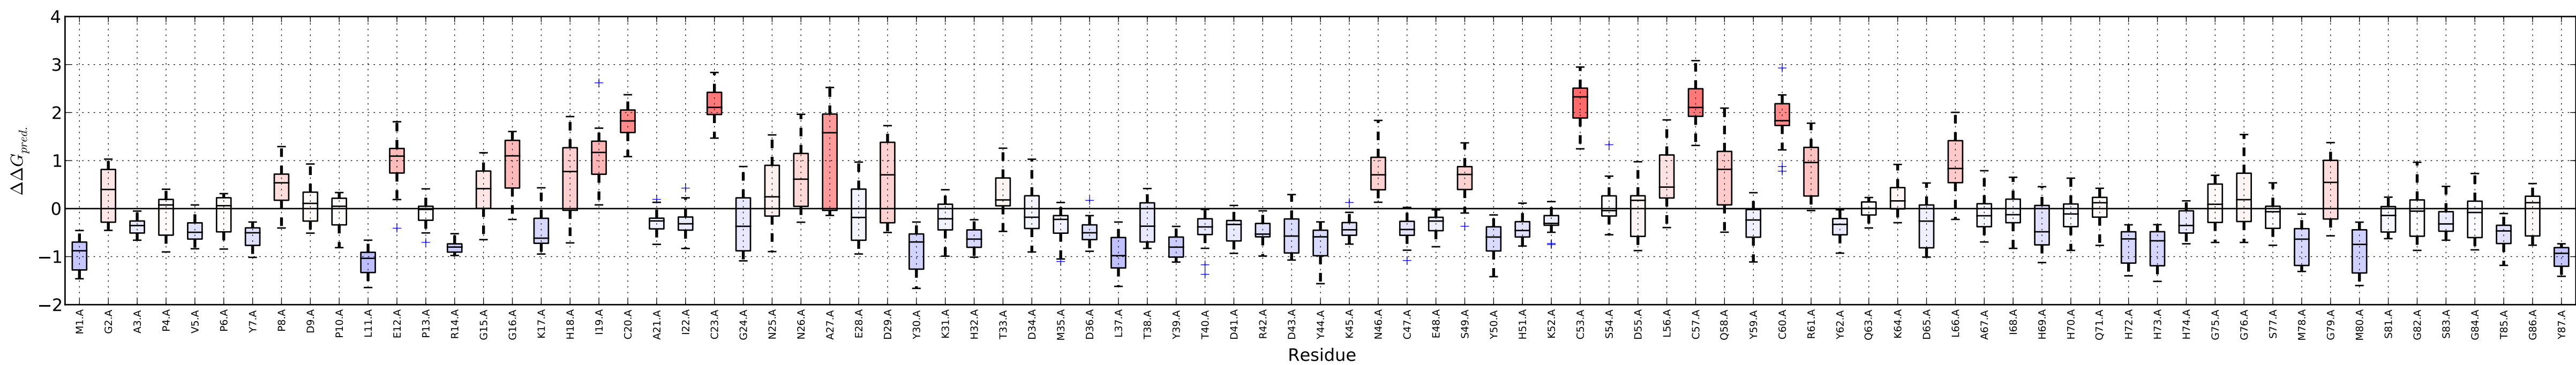

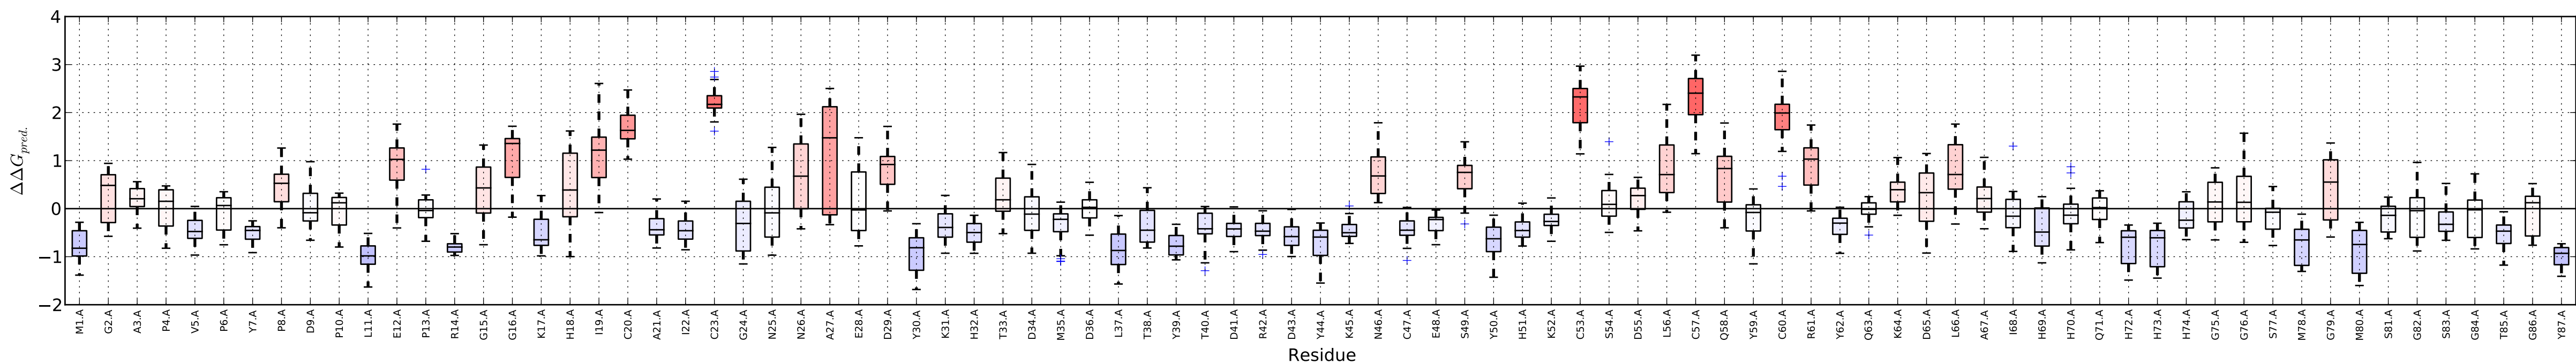

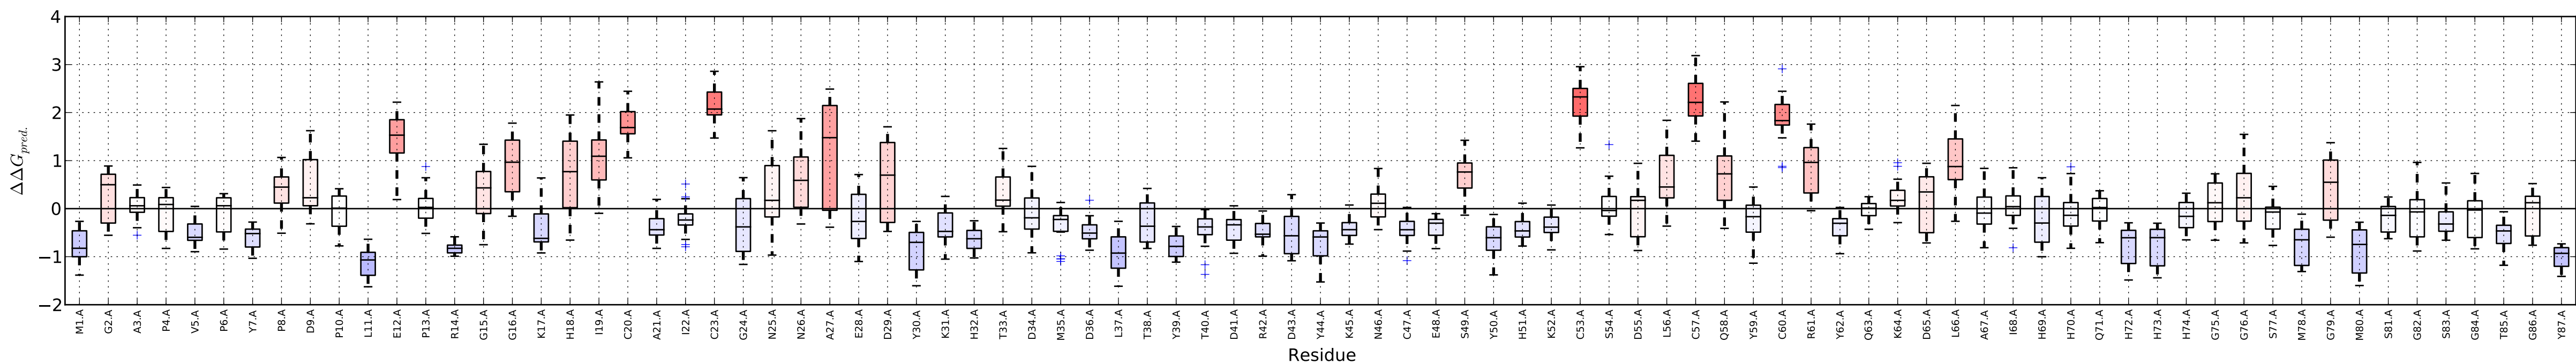

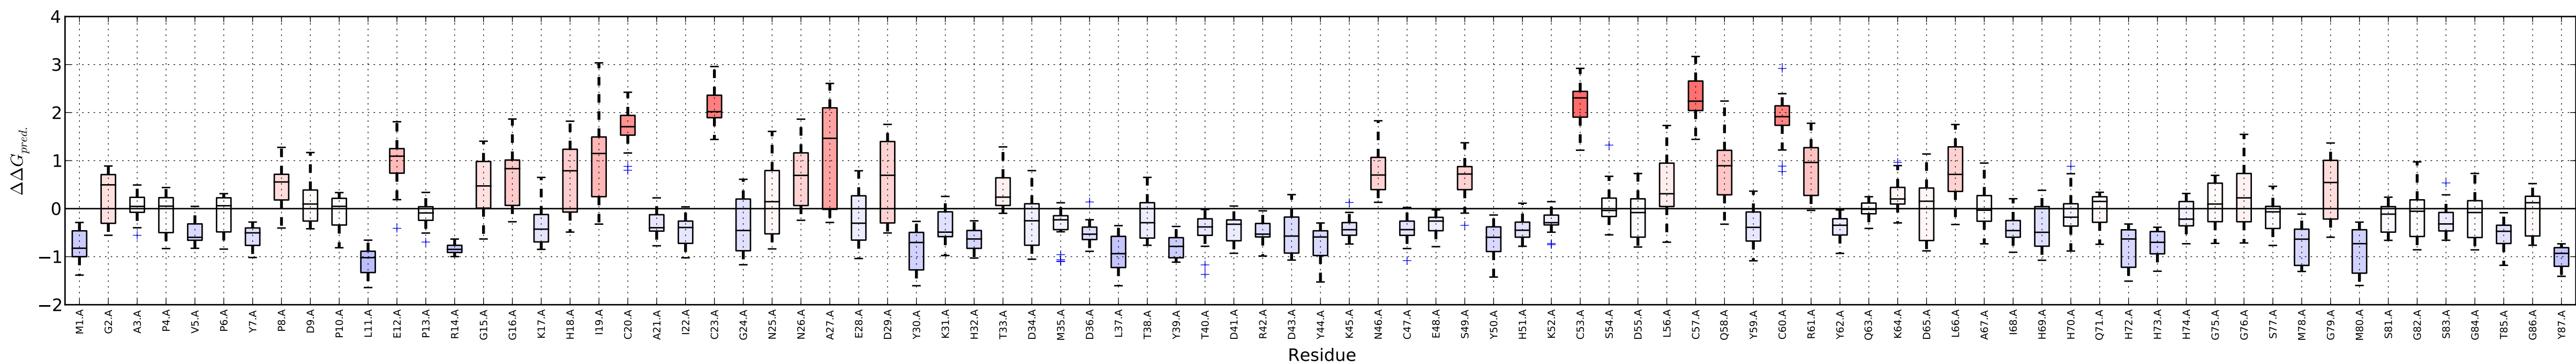

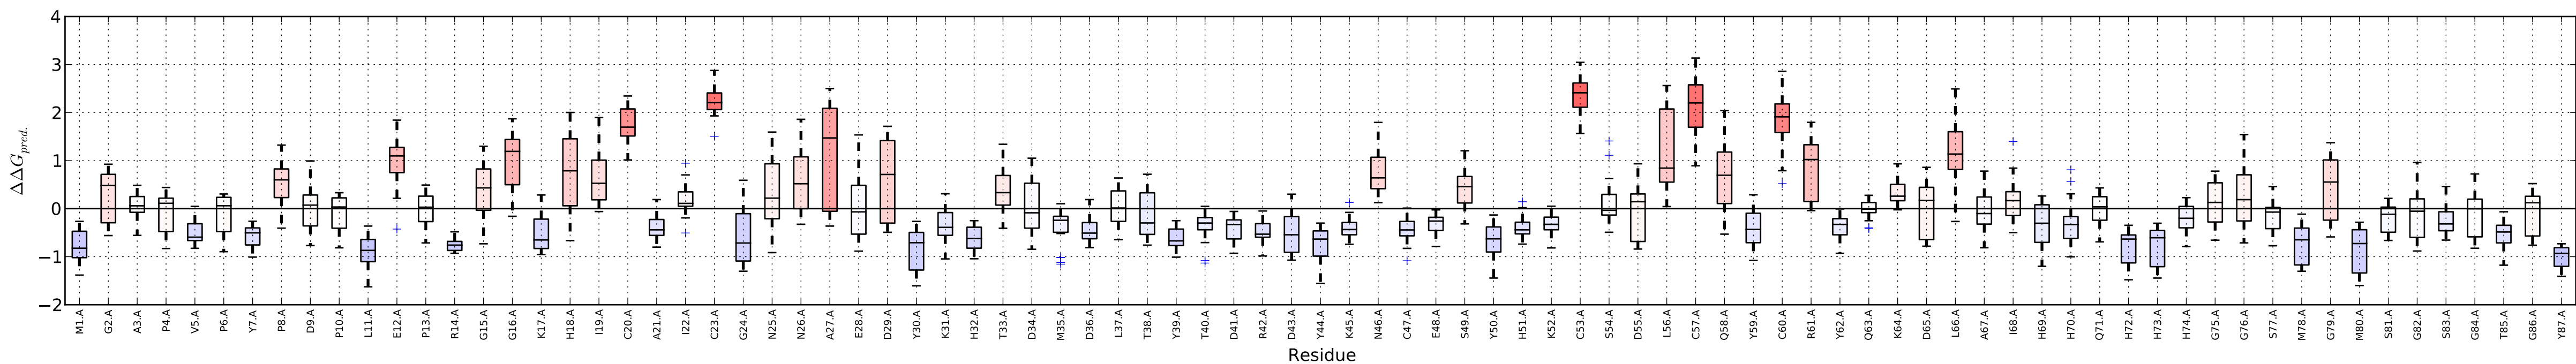

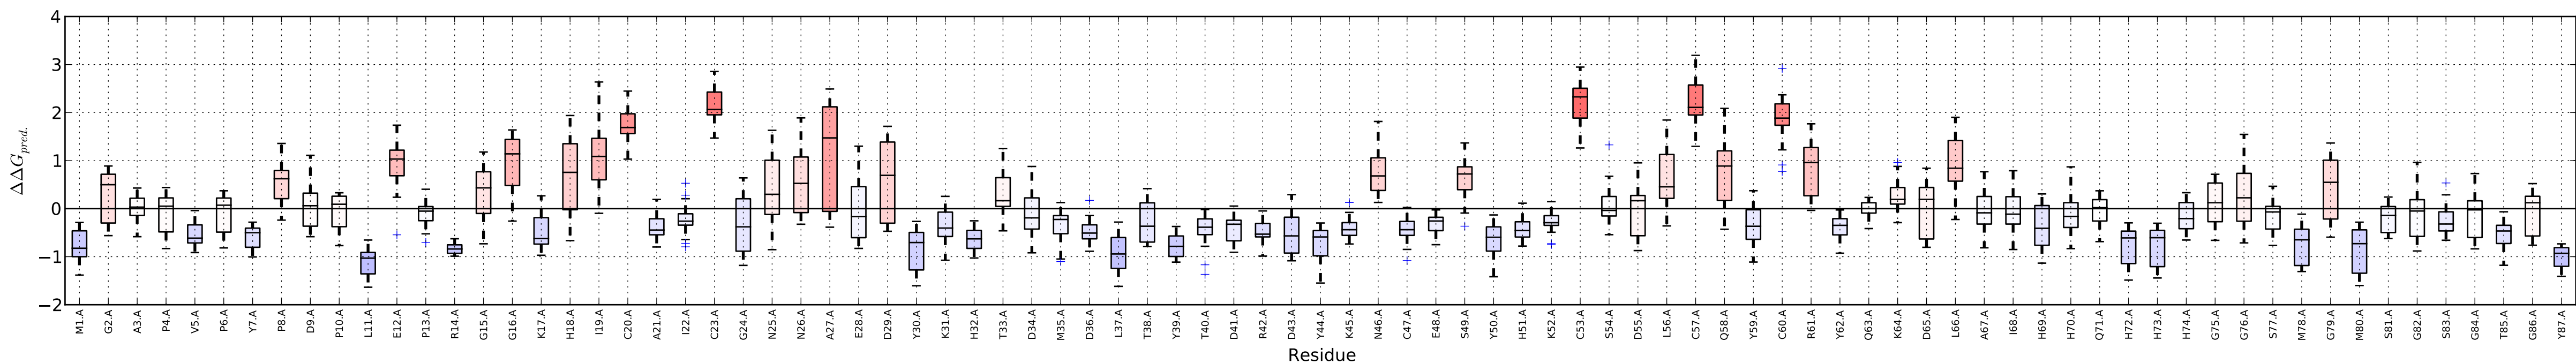

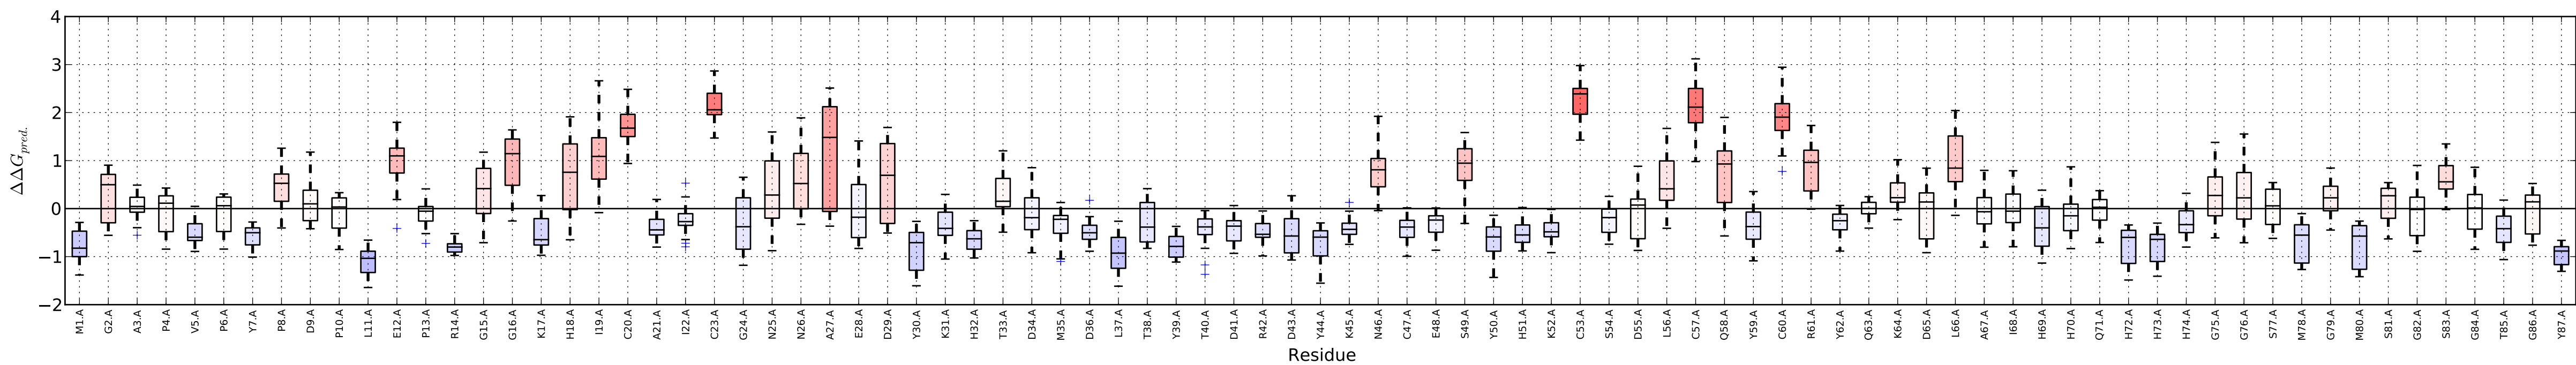



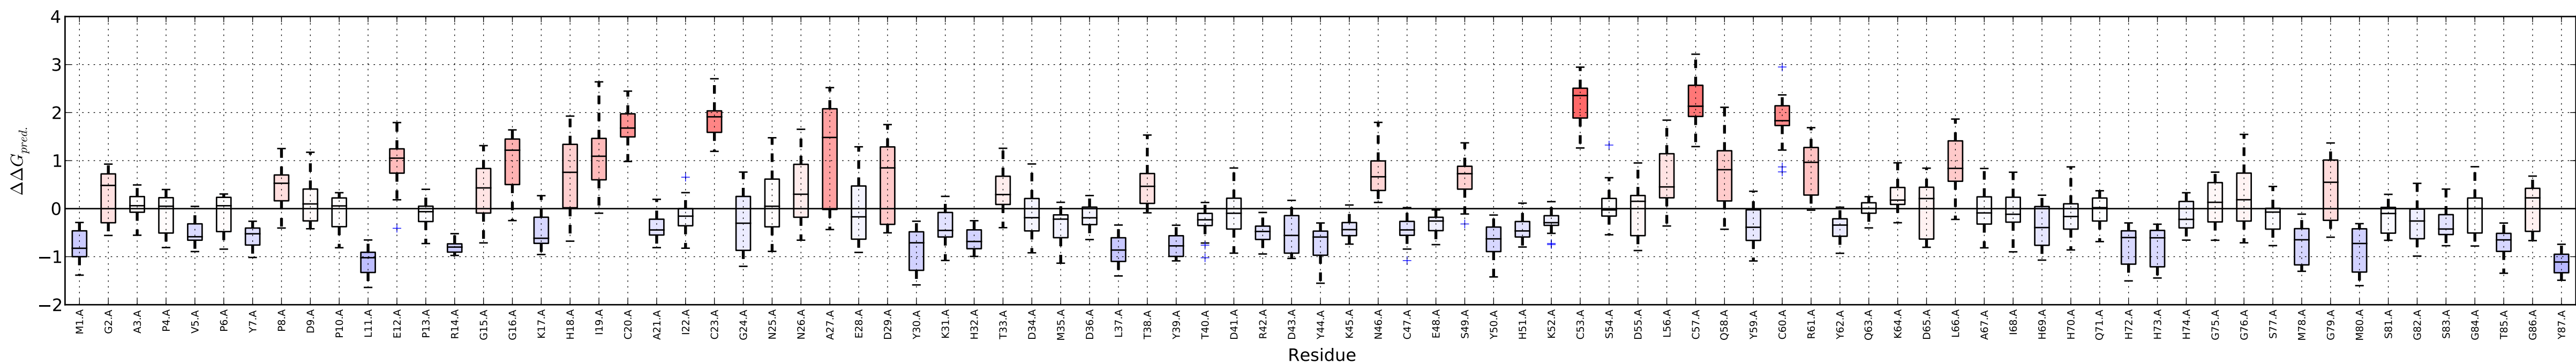

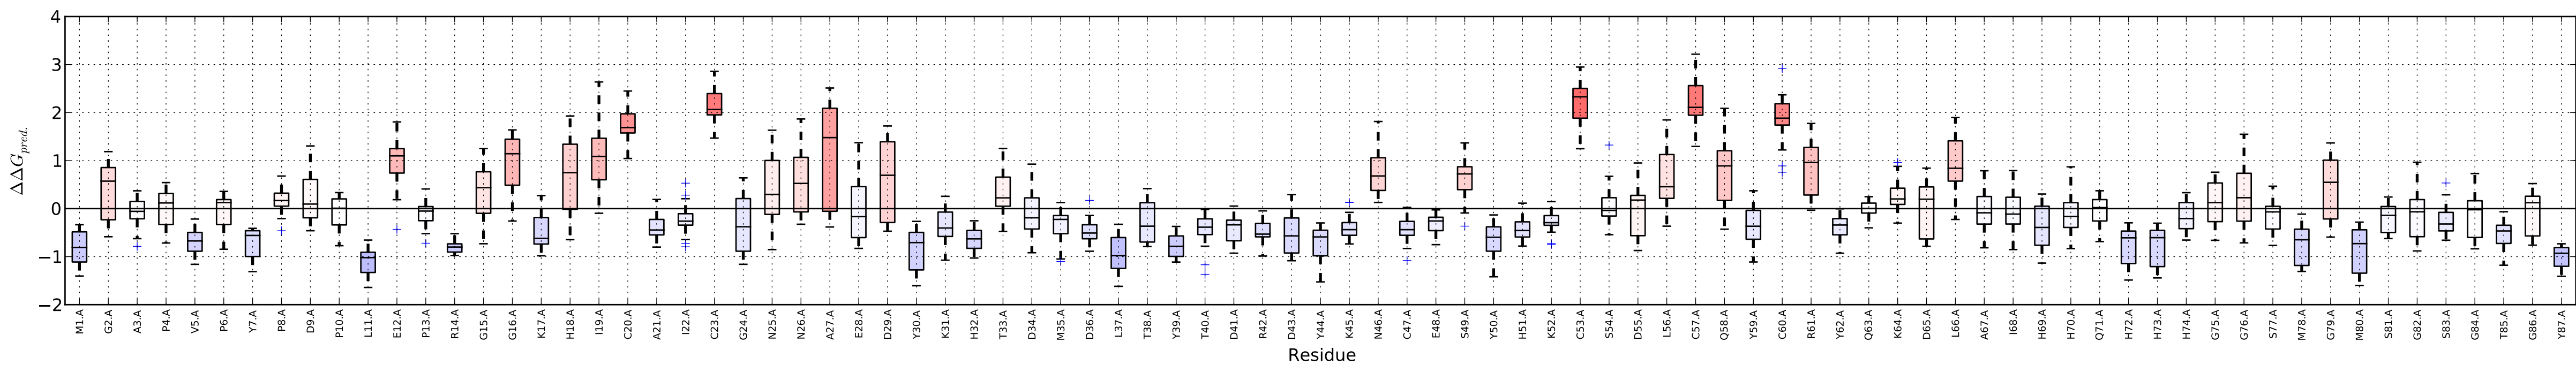

Supplement: Supplementary file 2 [file supplementary]

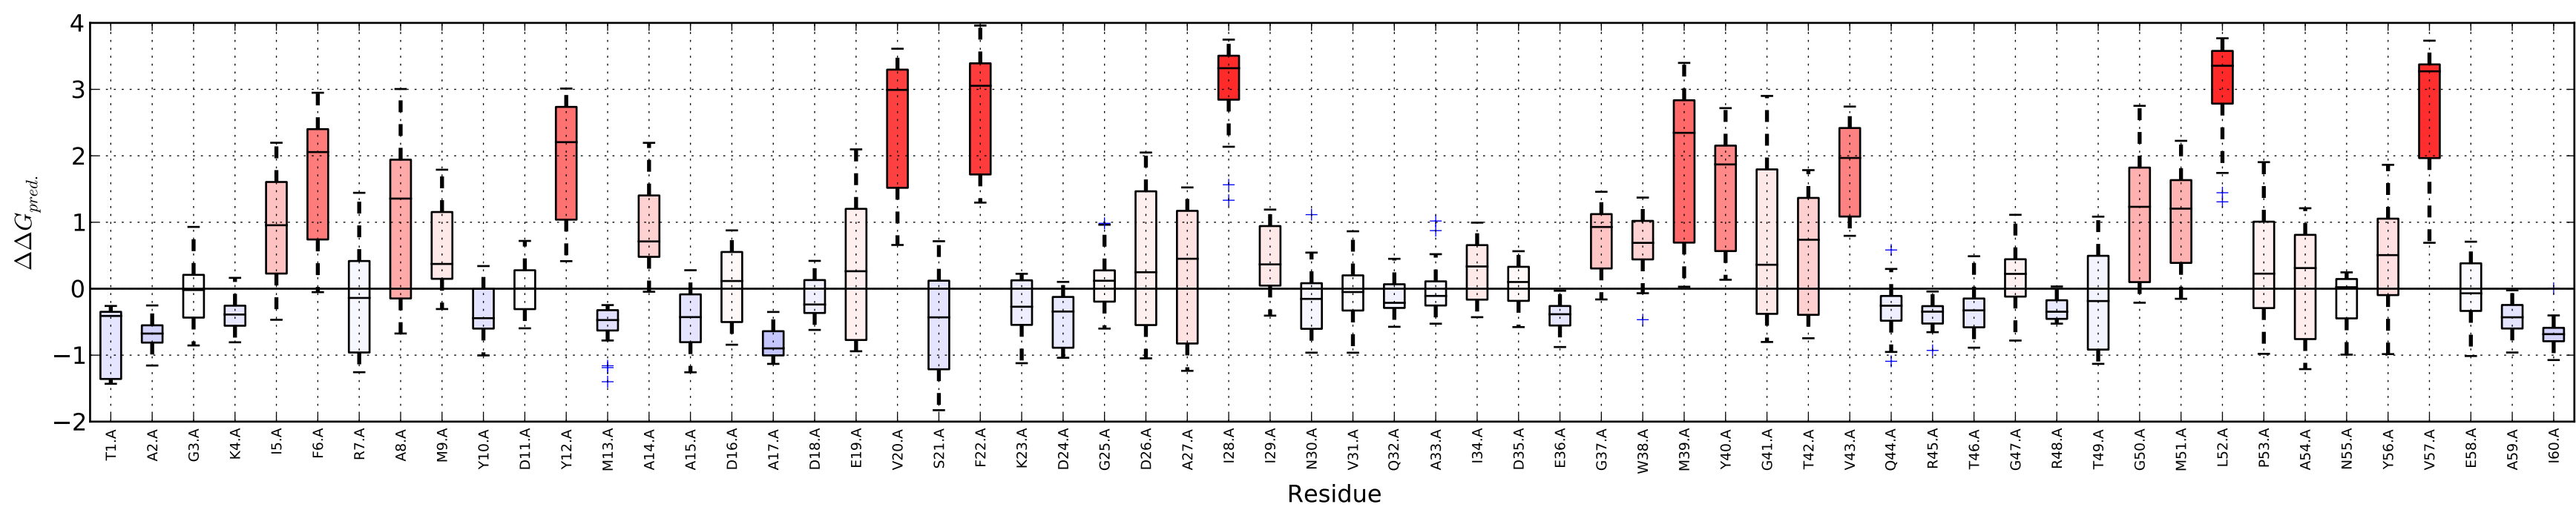

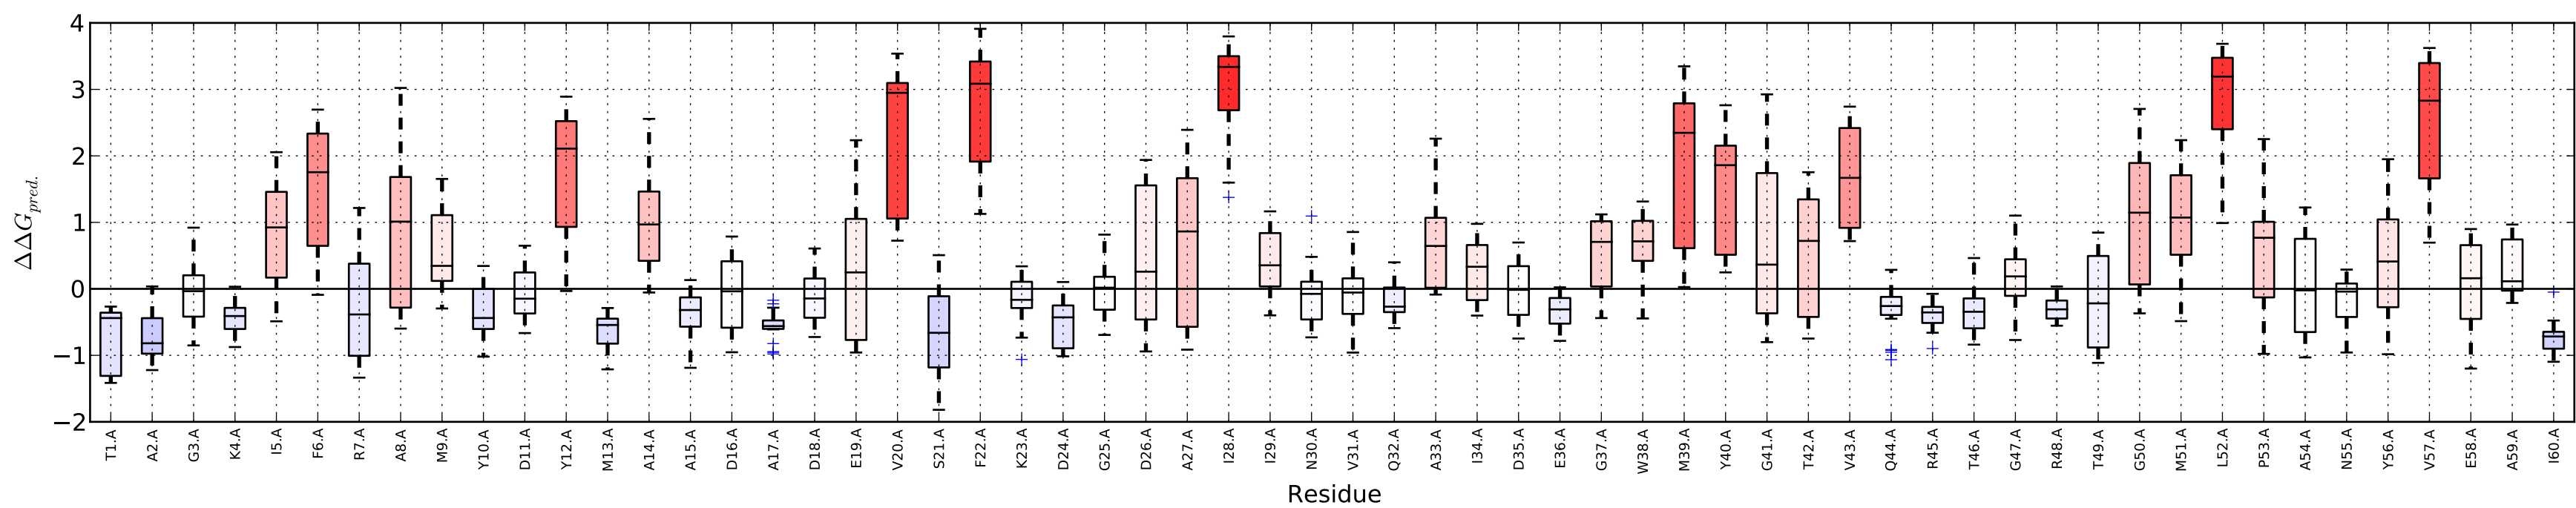

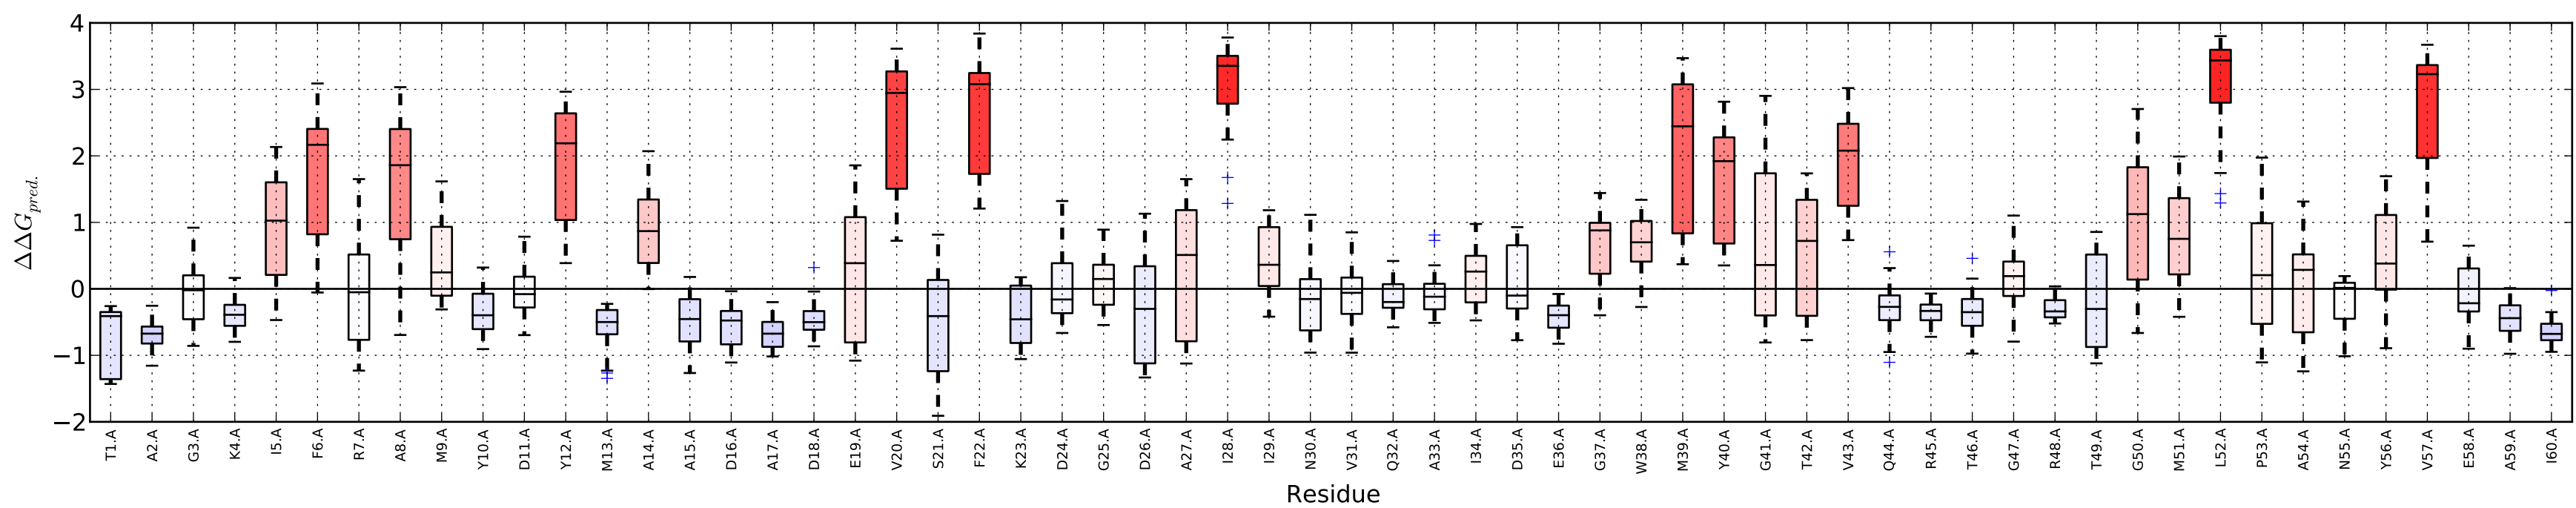

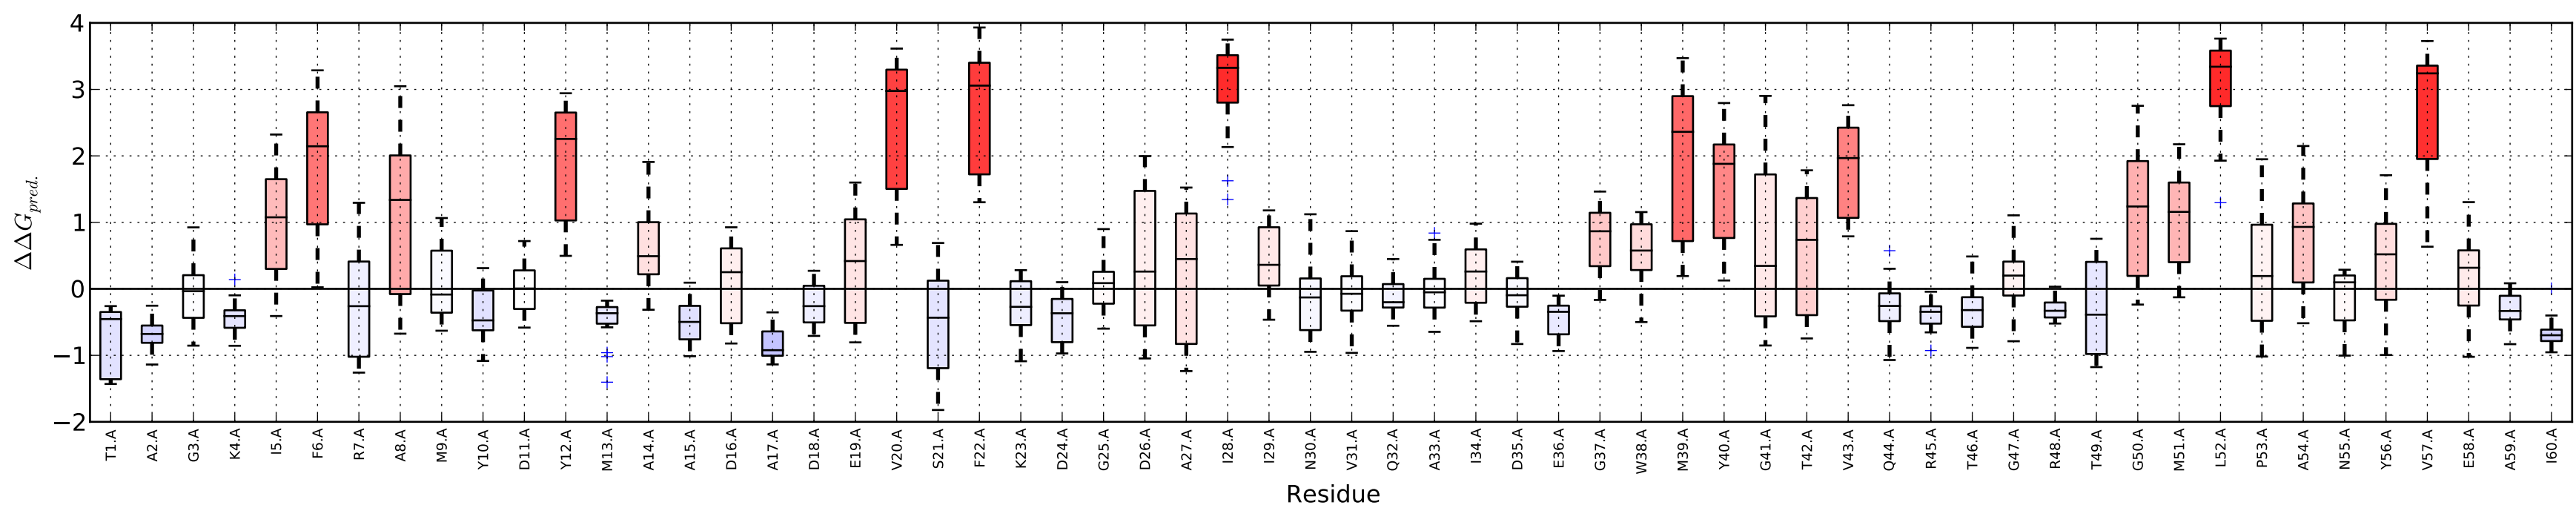

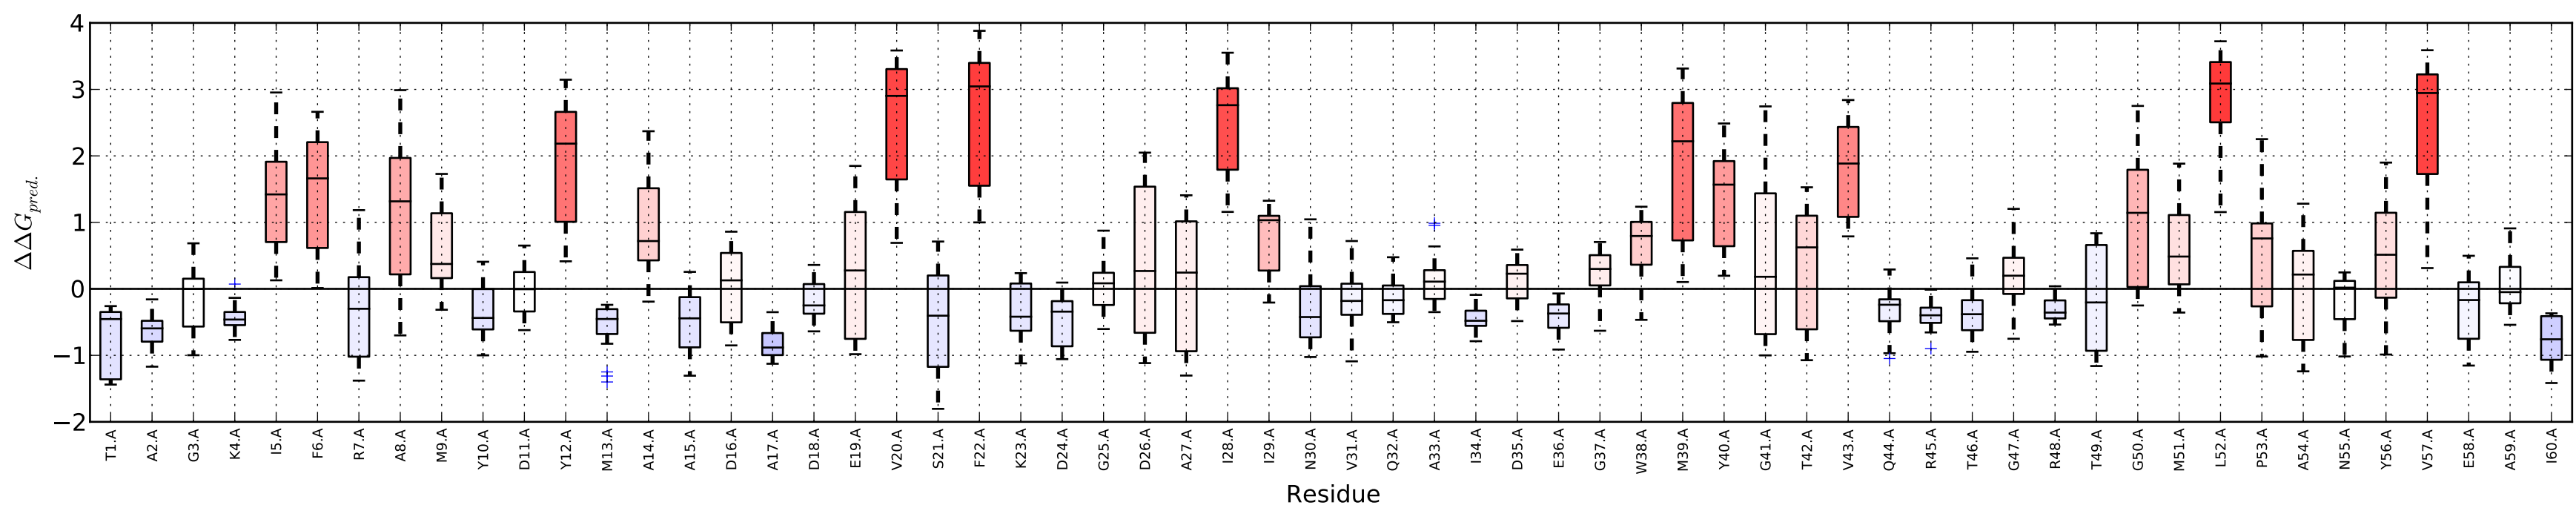

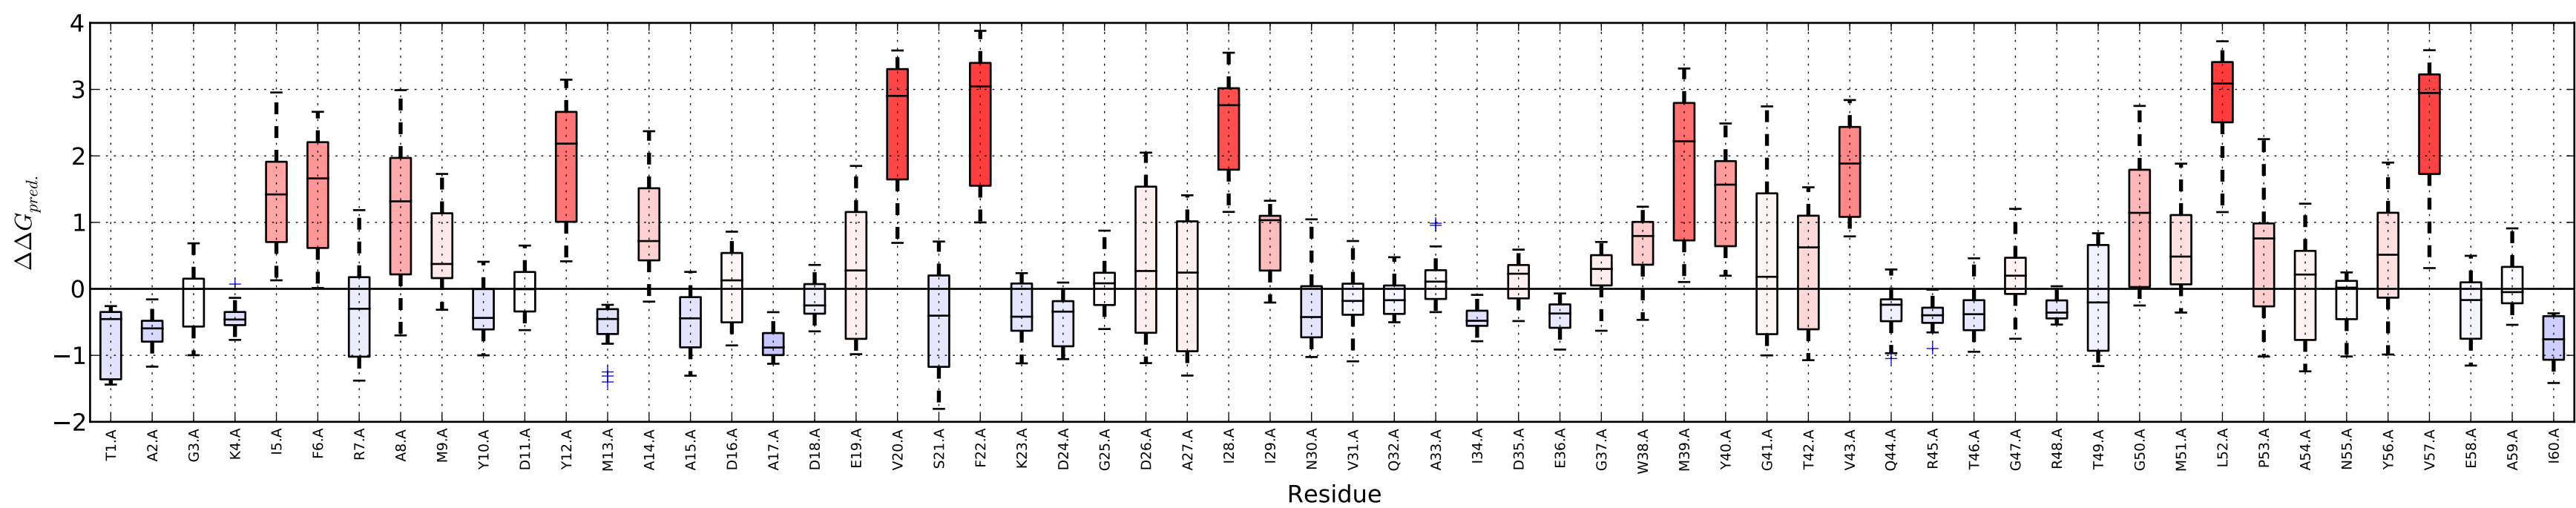

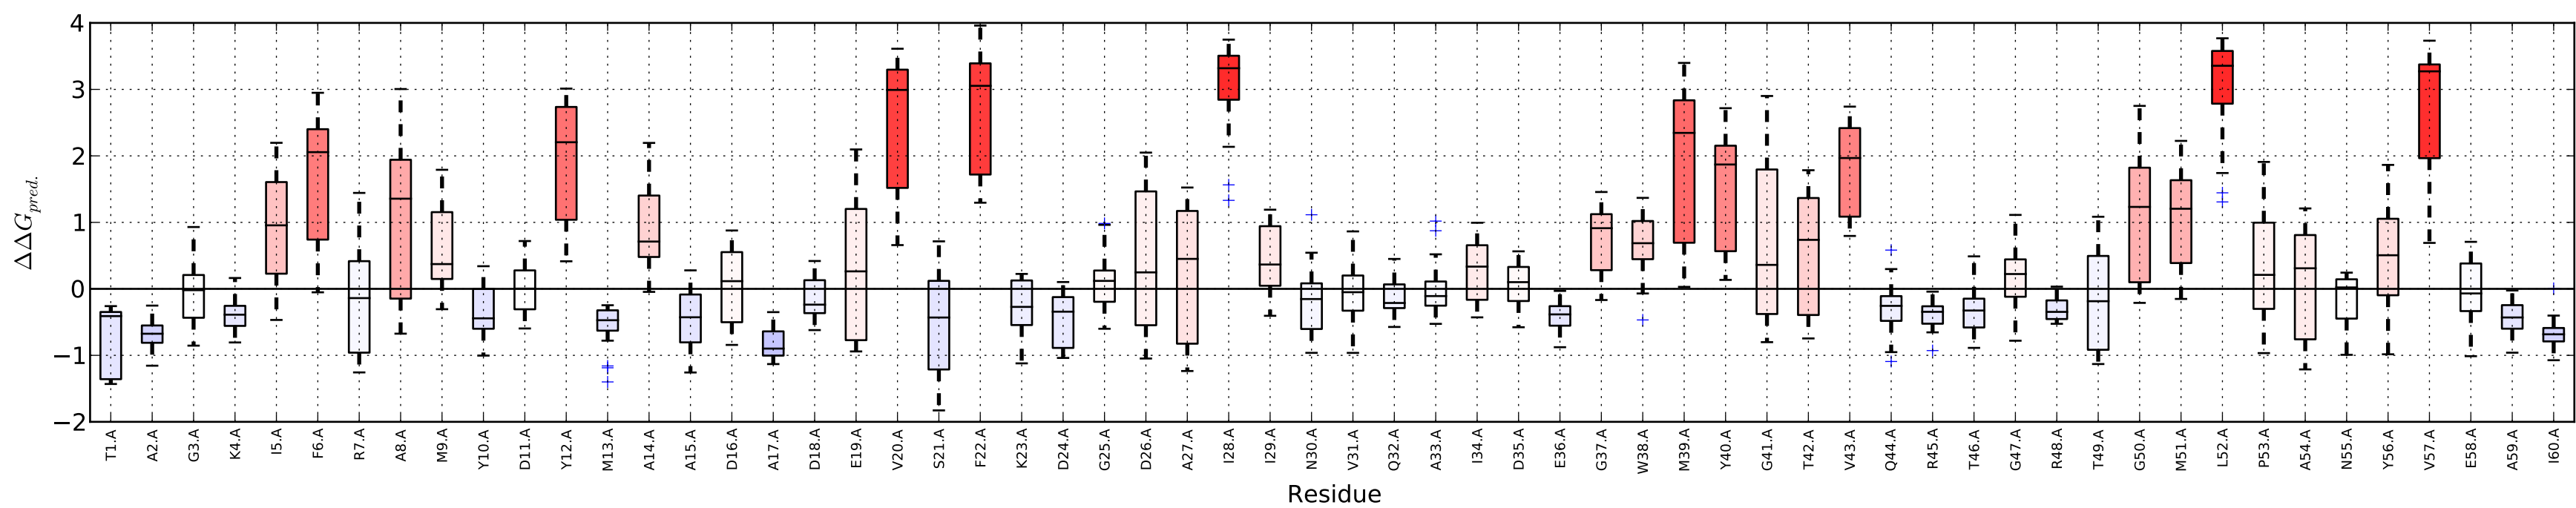

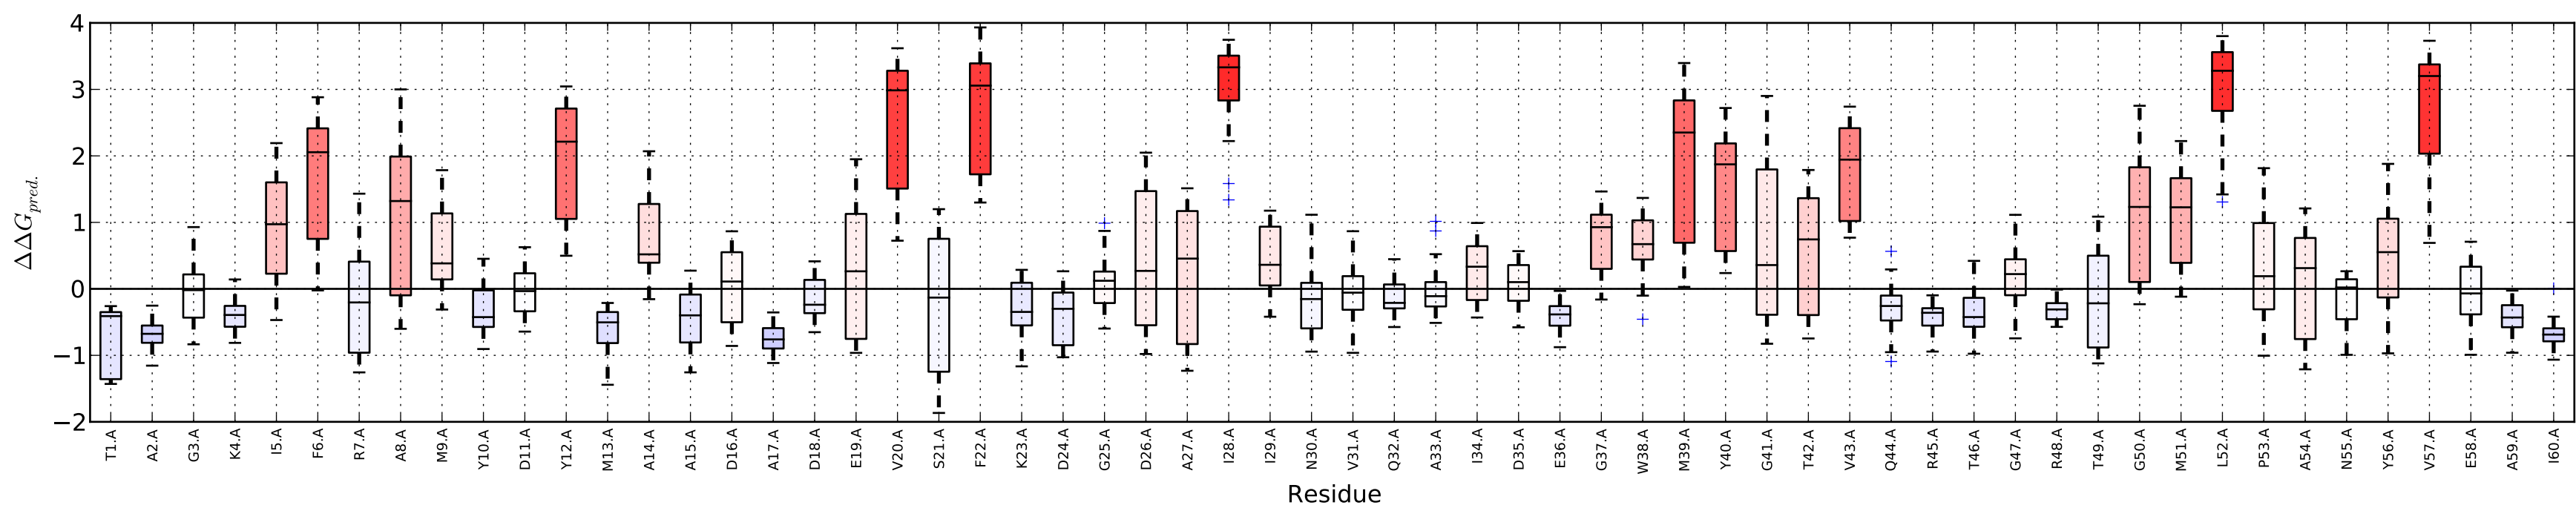



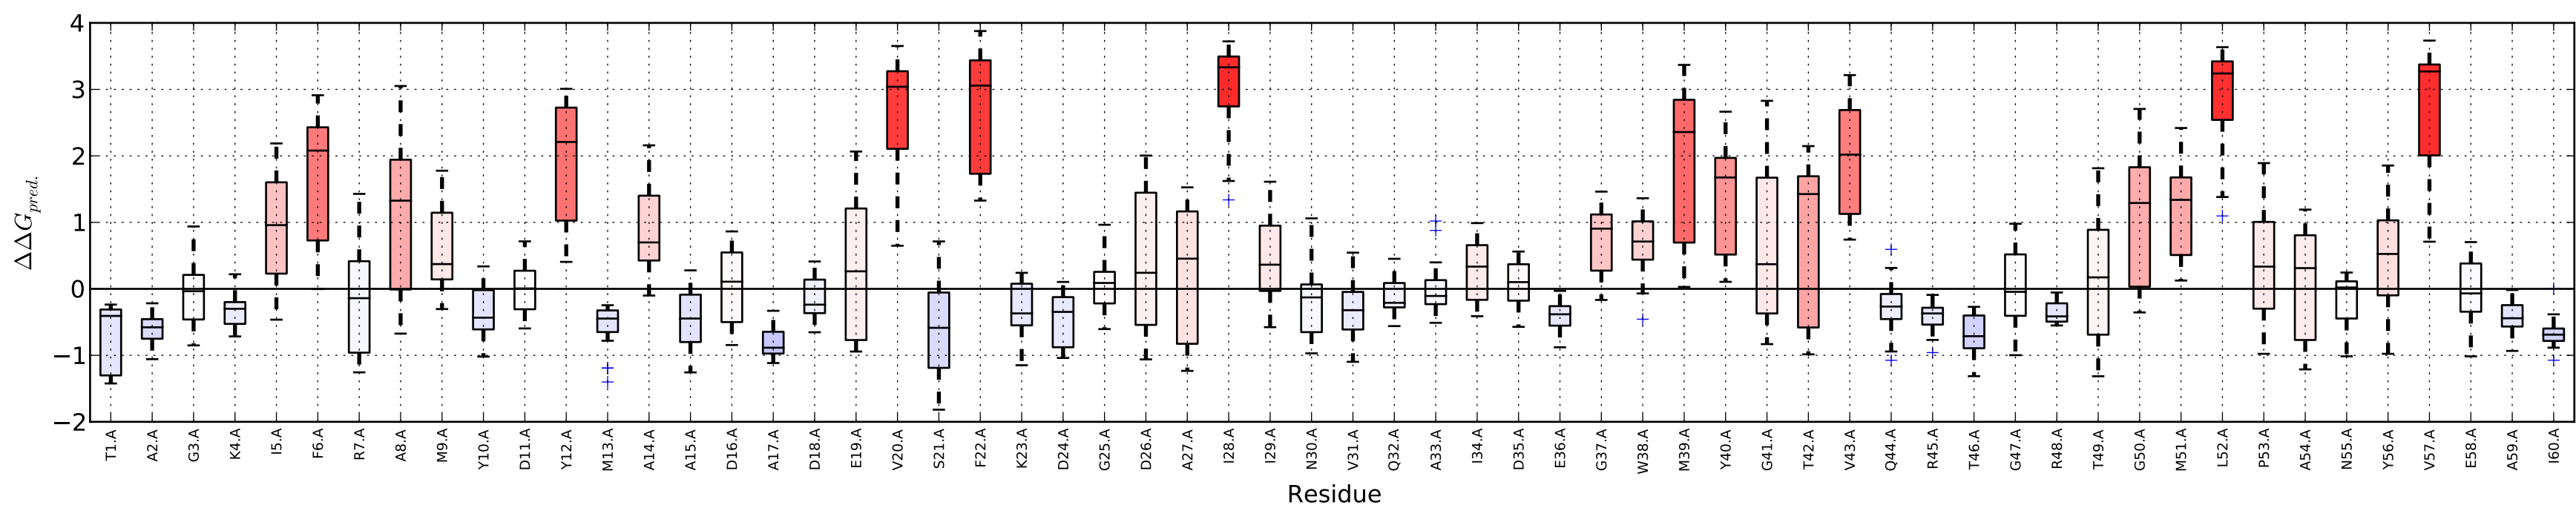

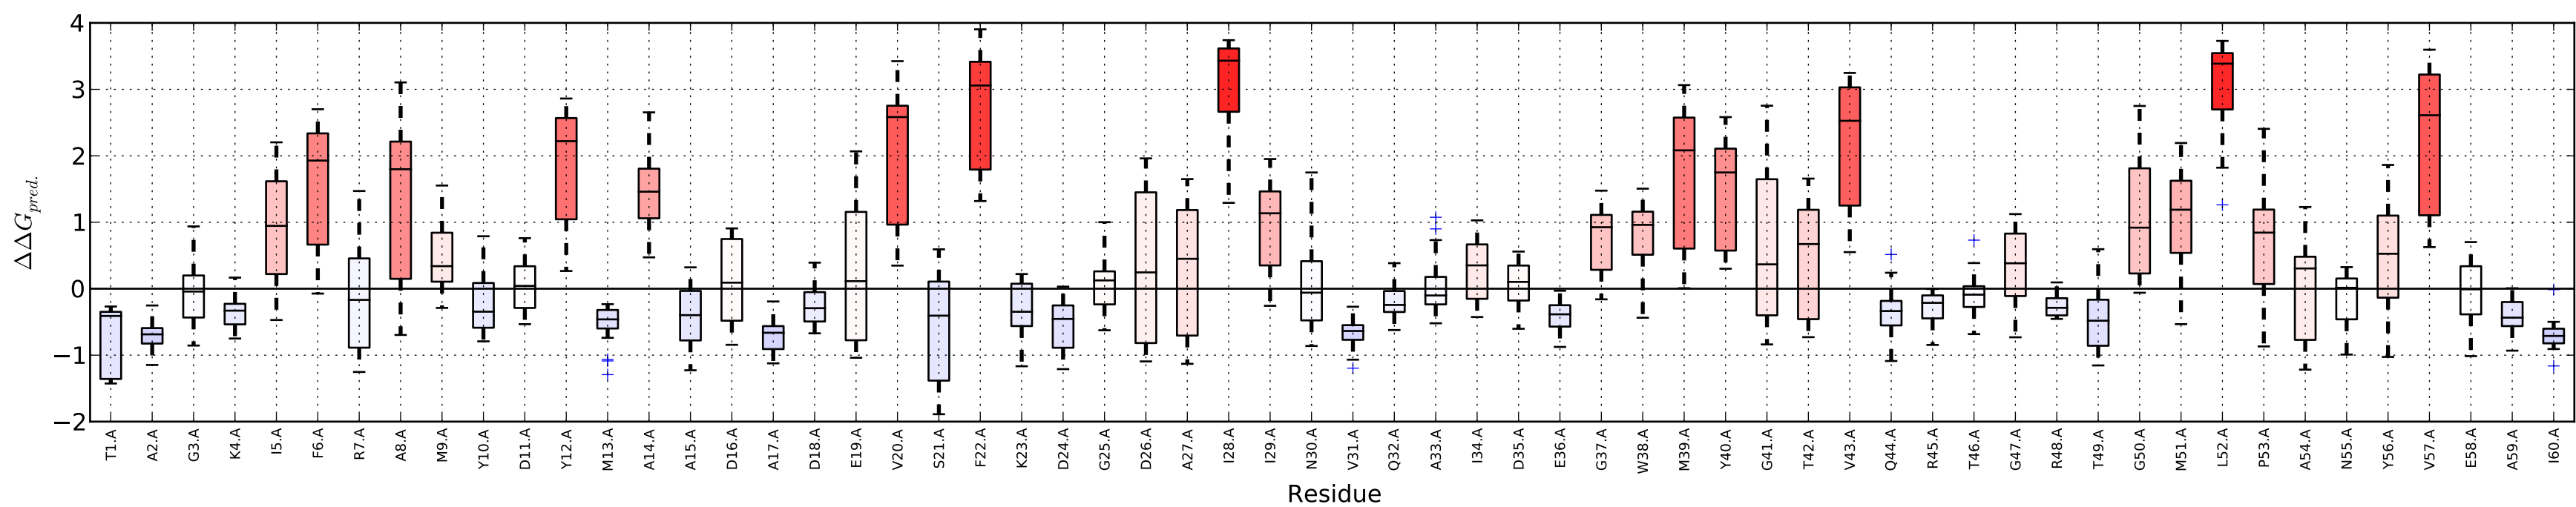

Supplement: Supplementary file 3 [file supplementary]

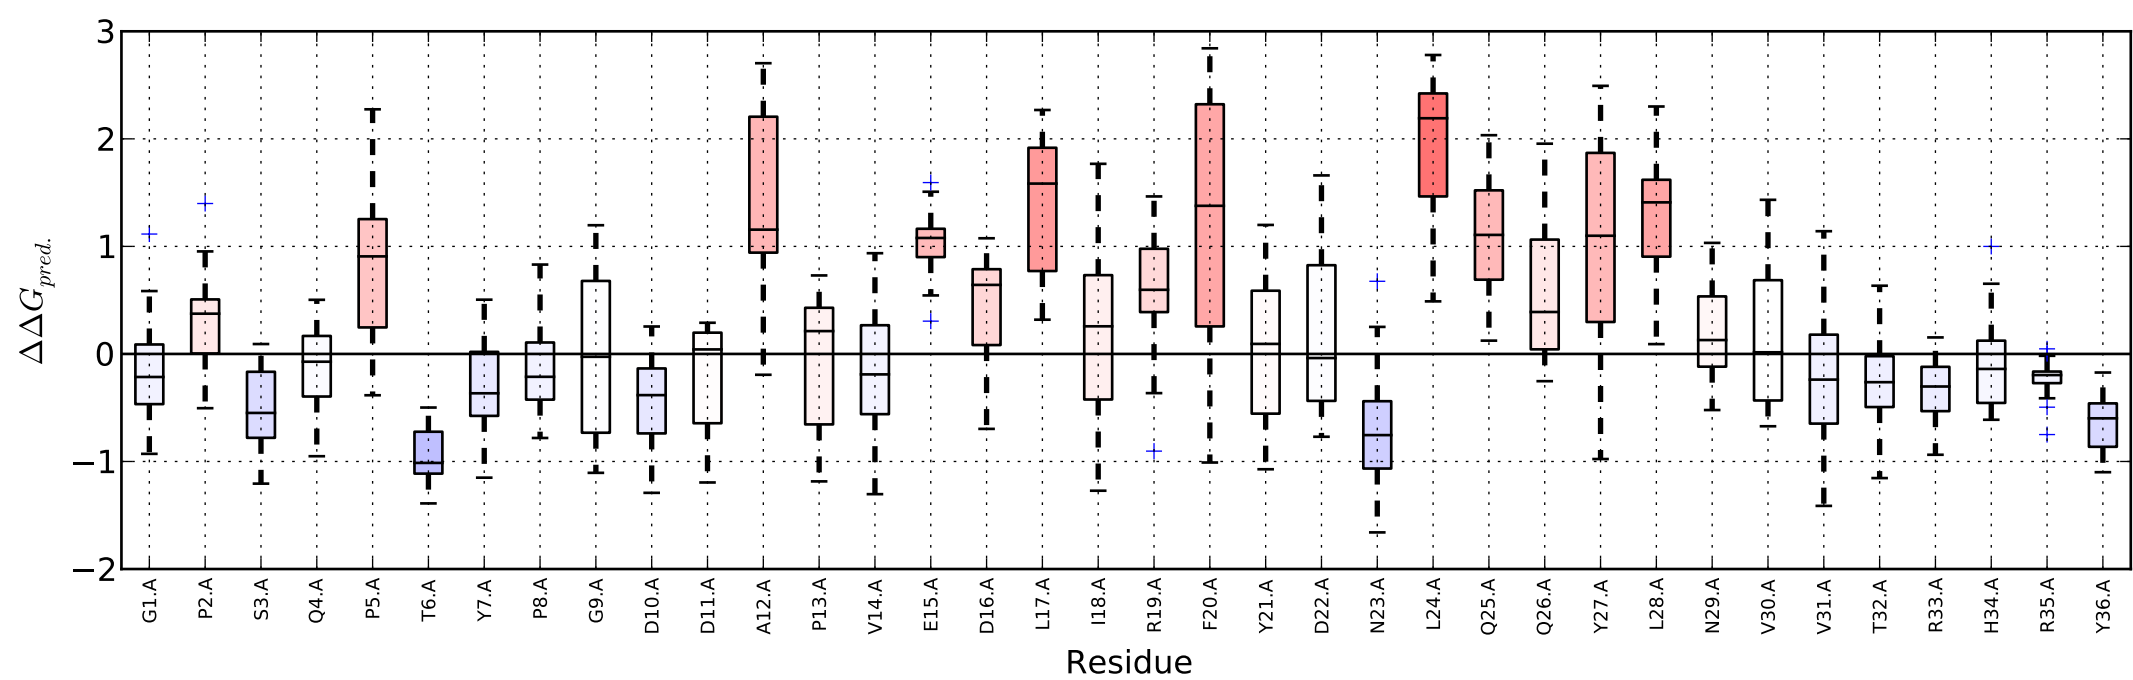

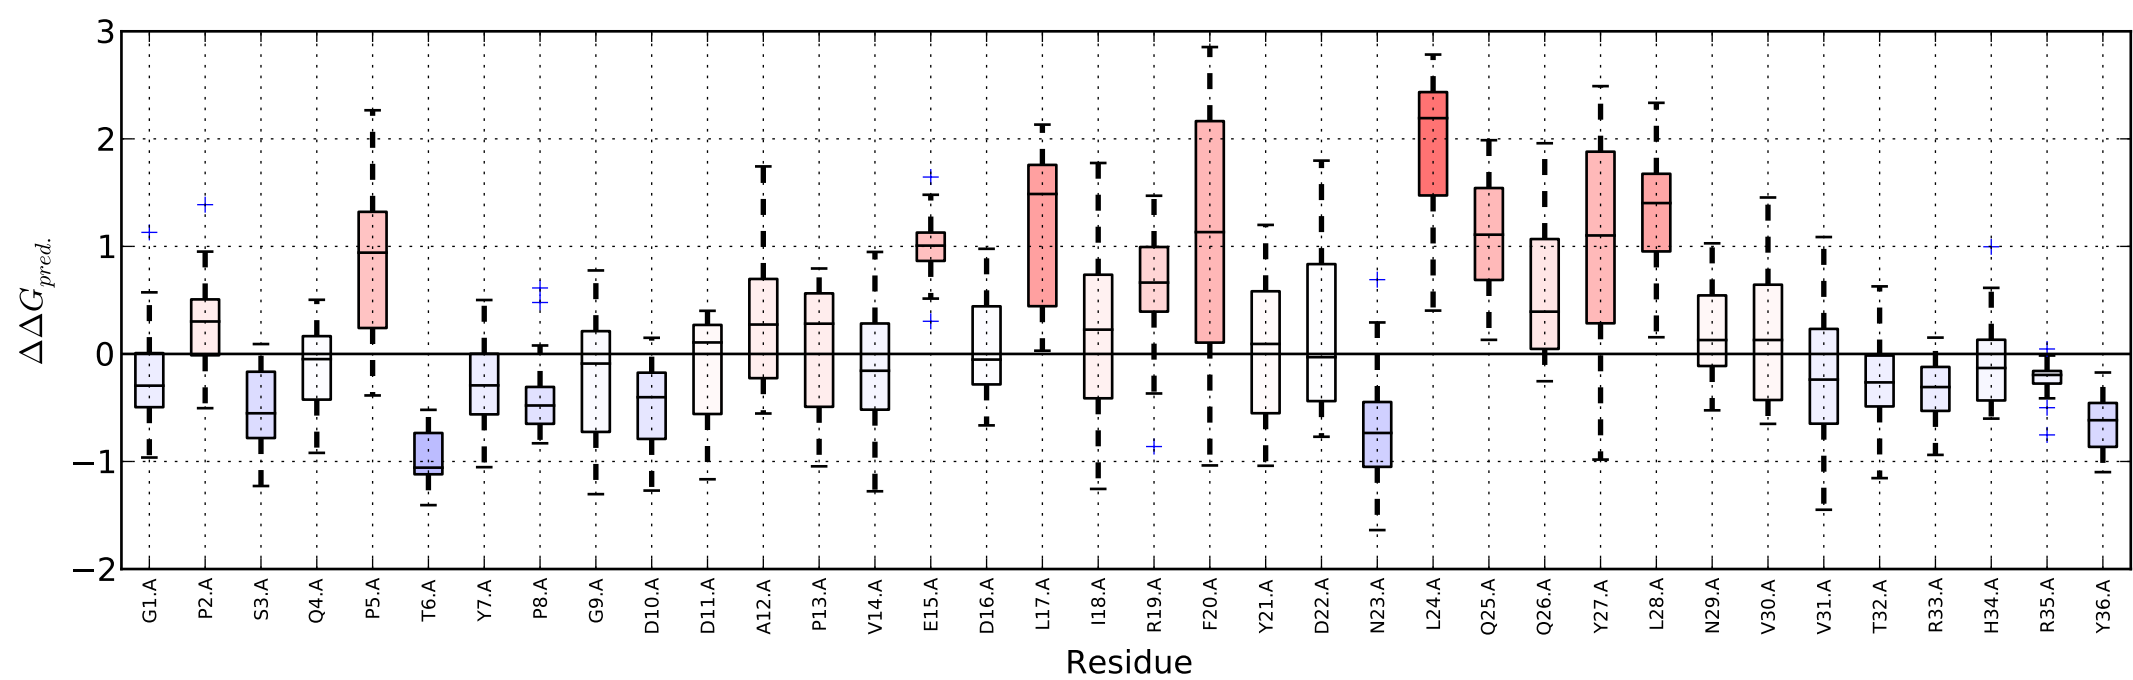

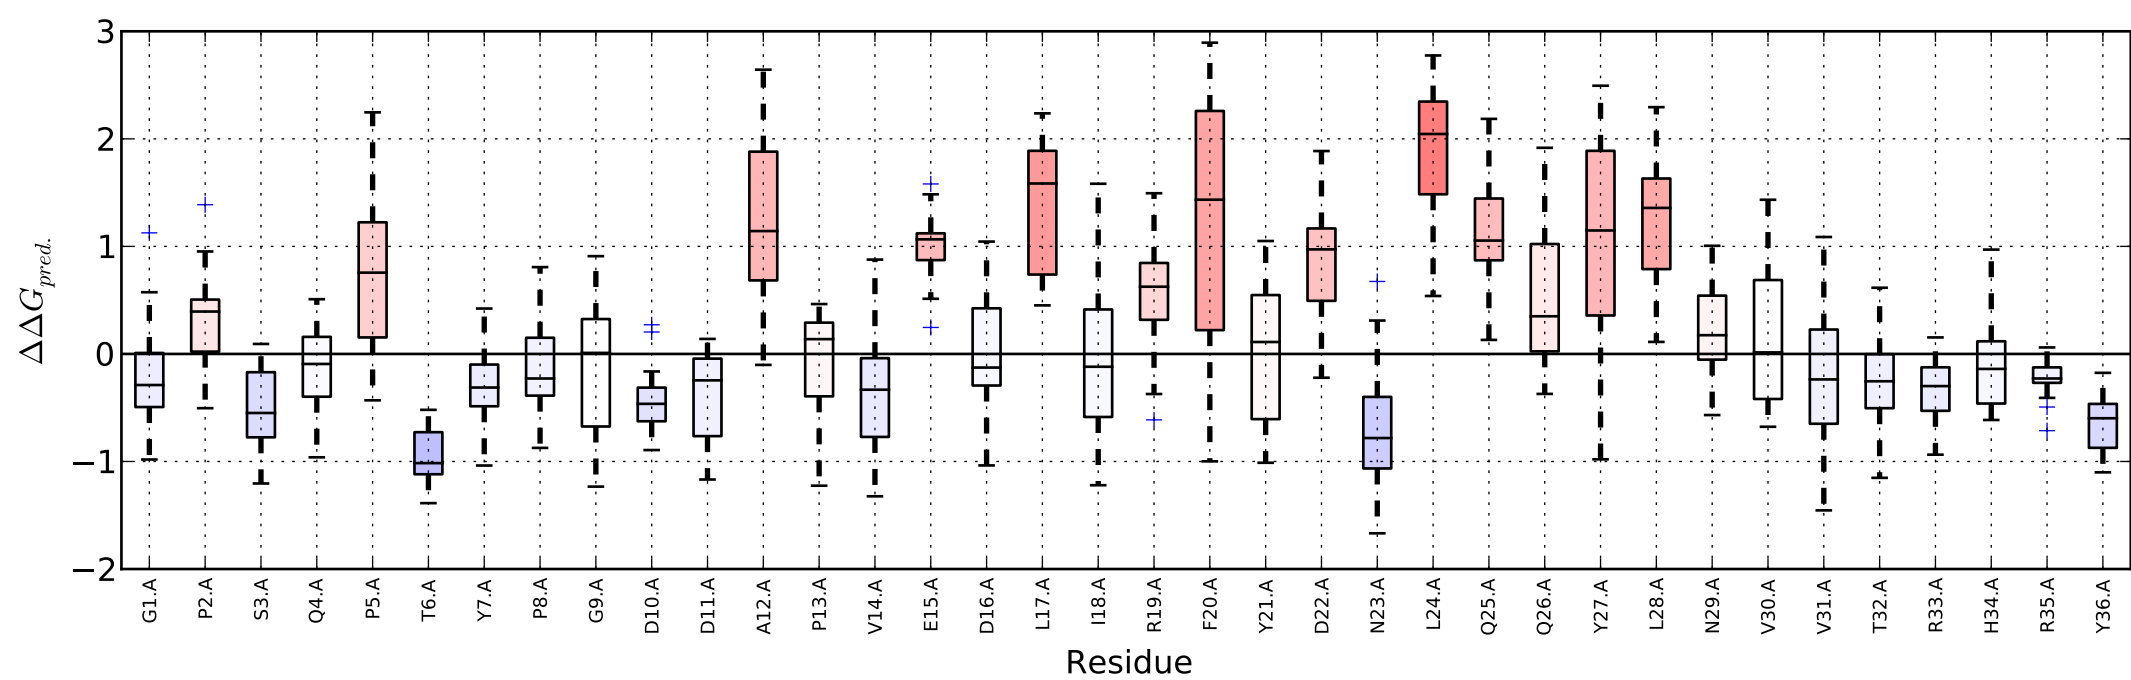

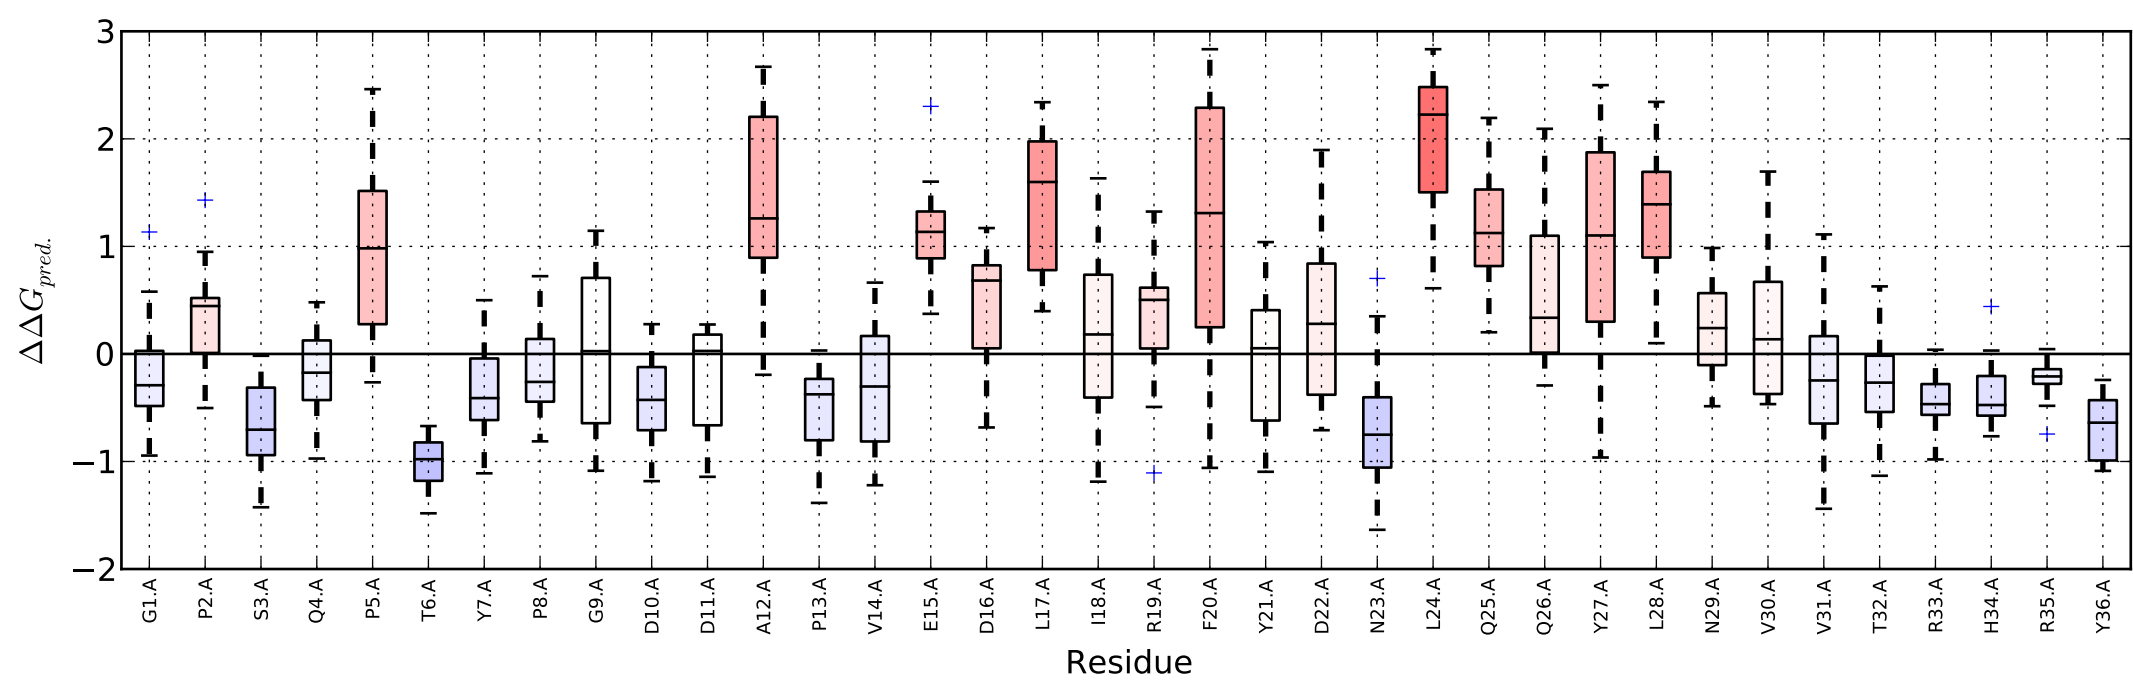

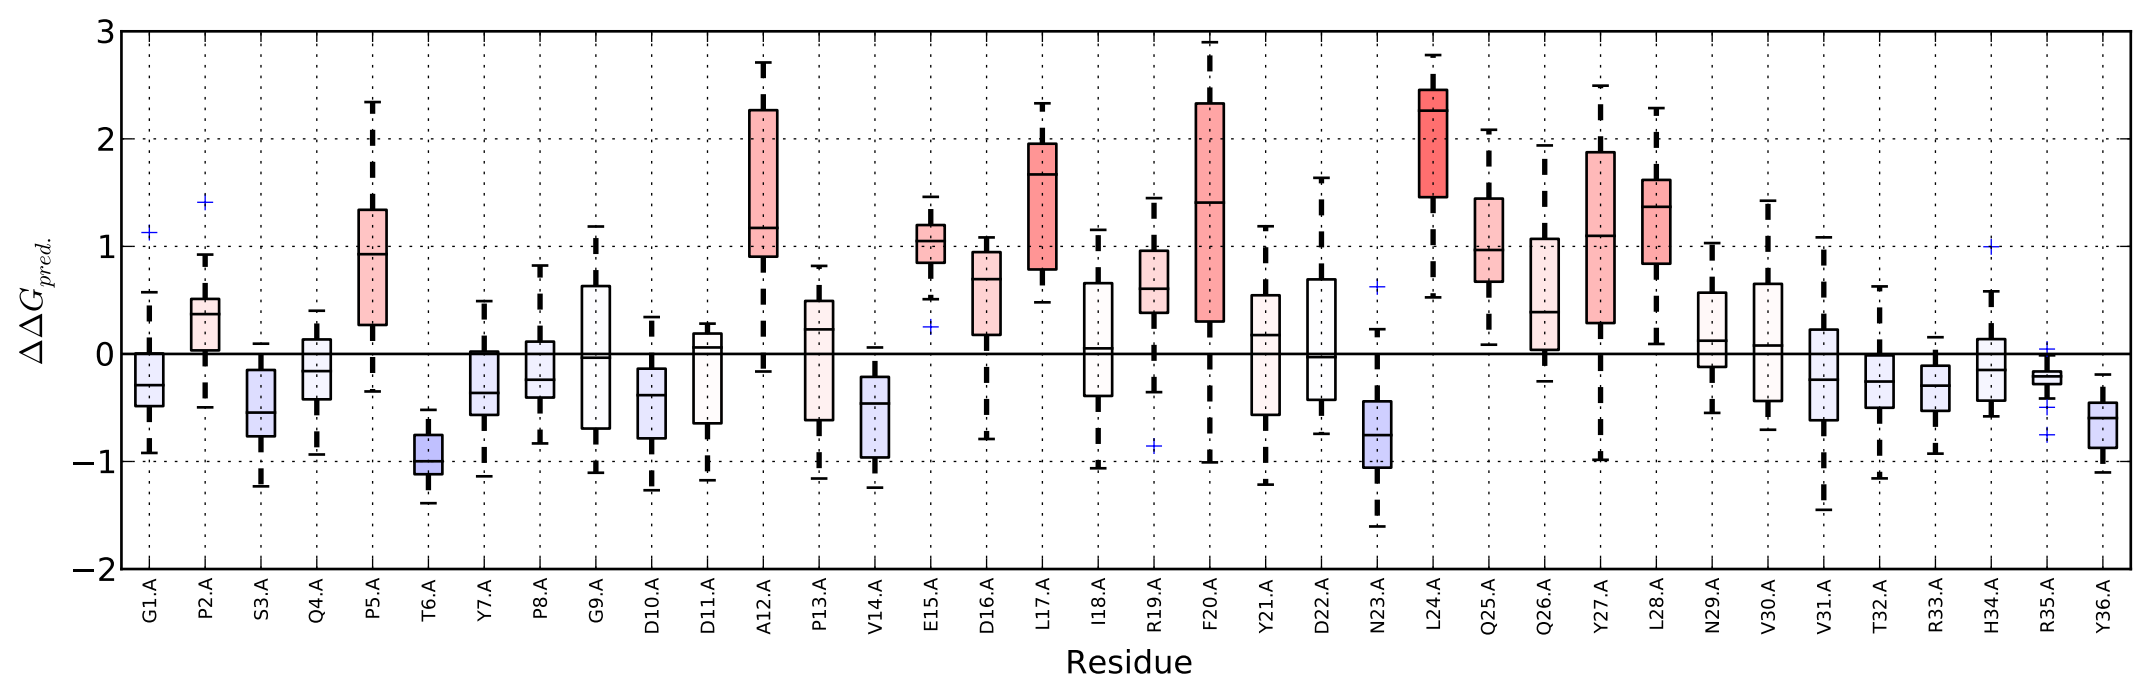

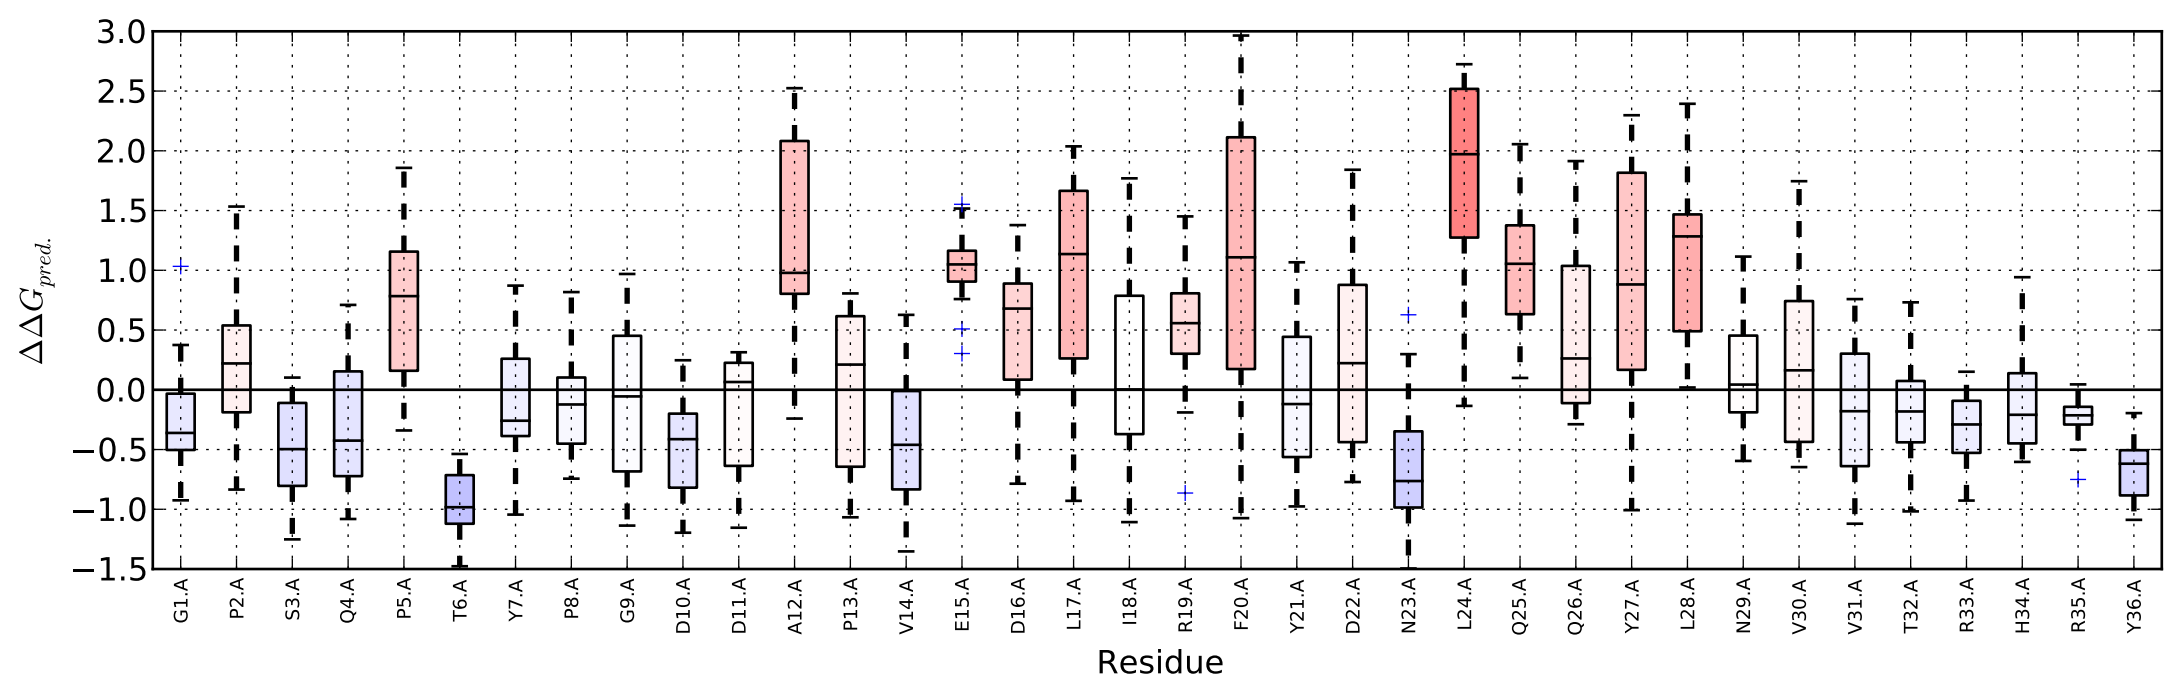

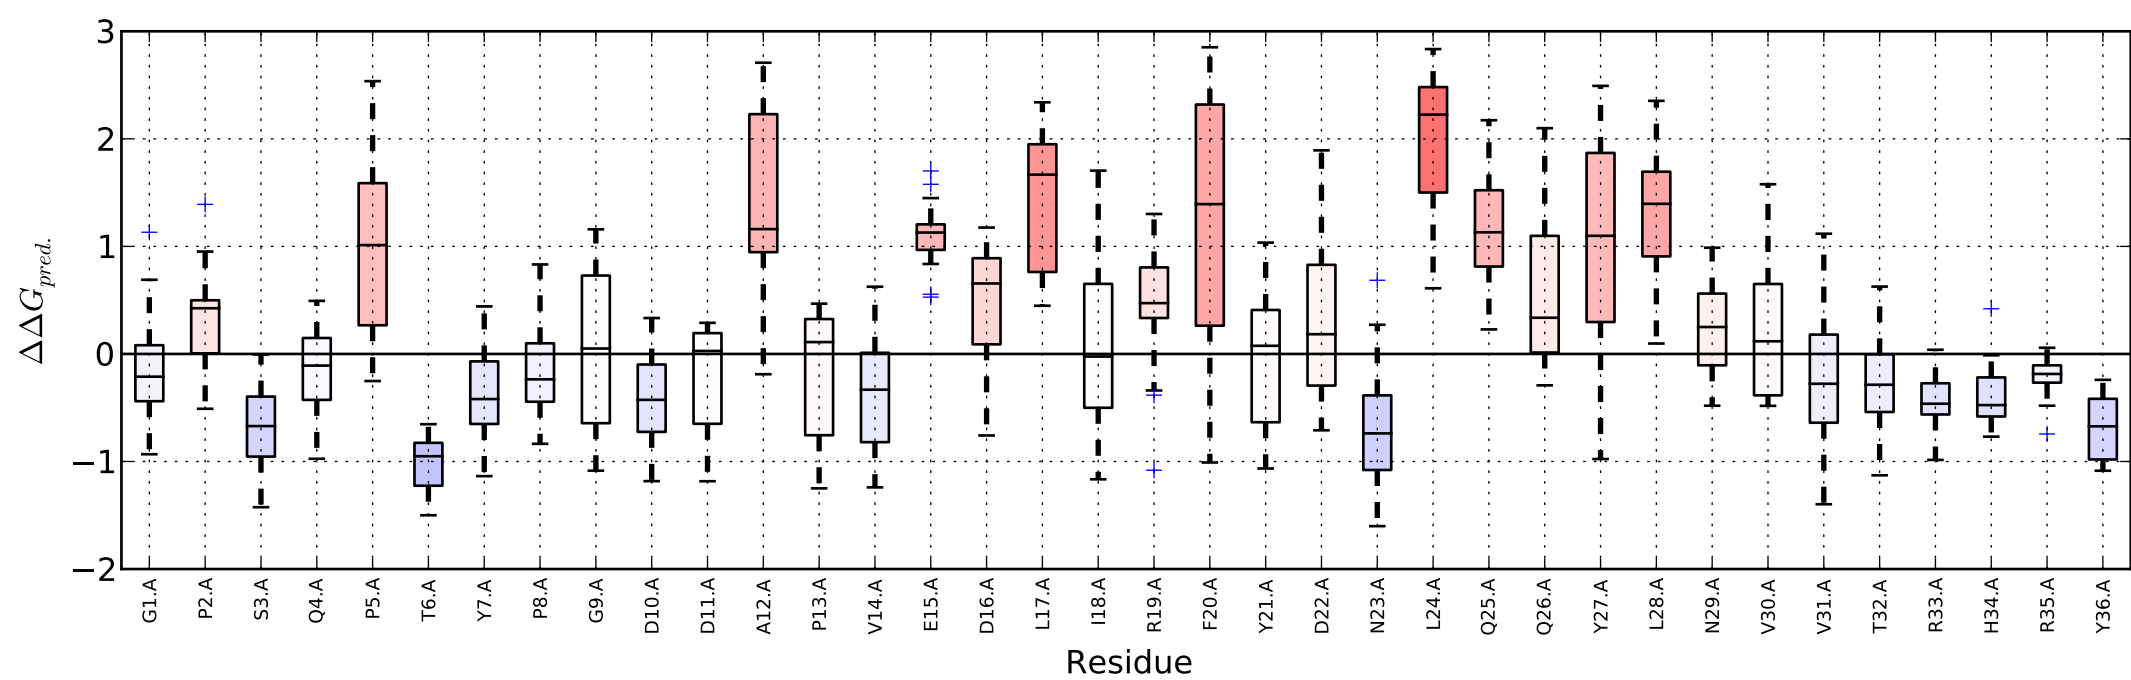

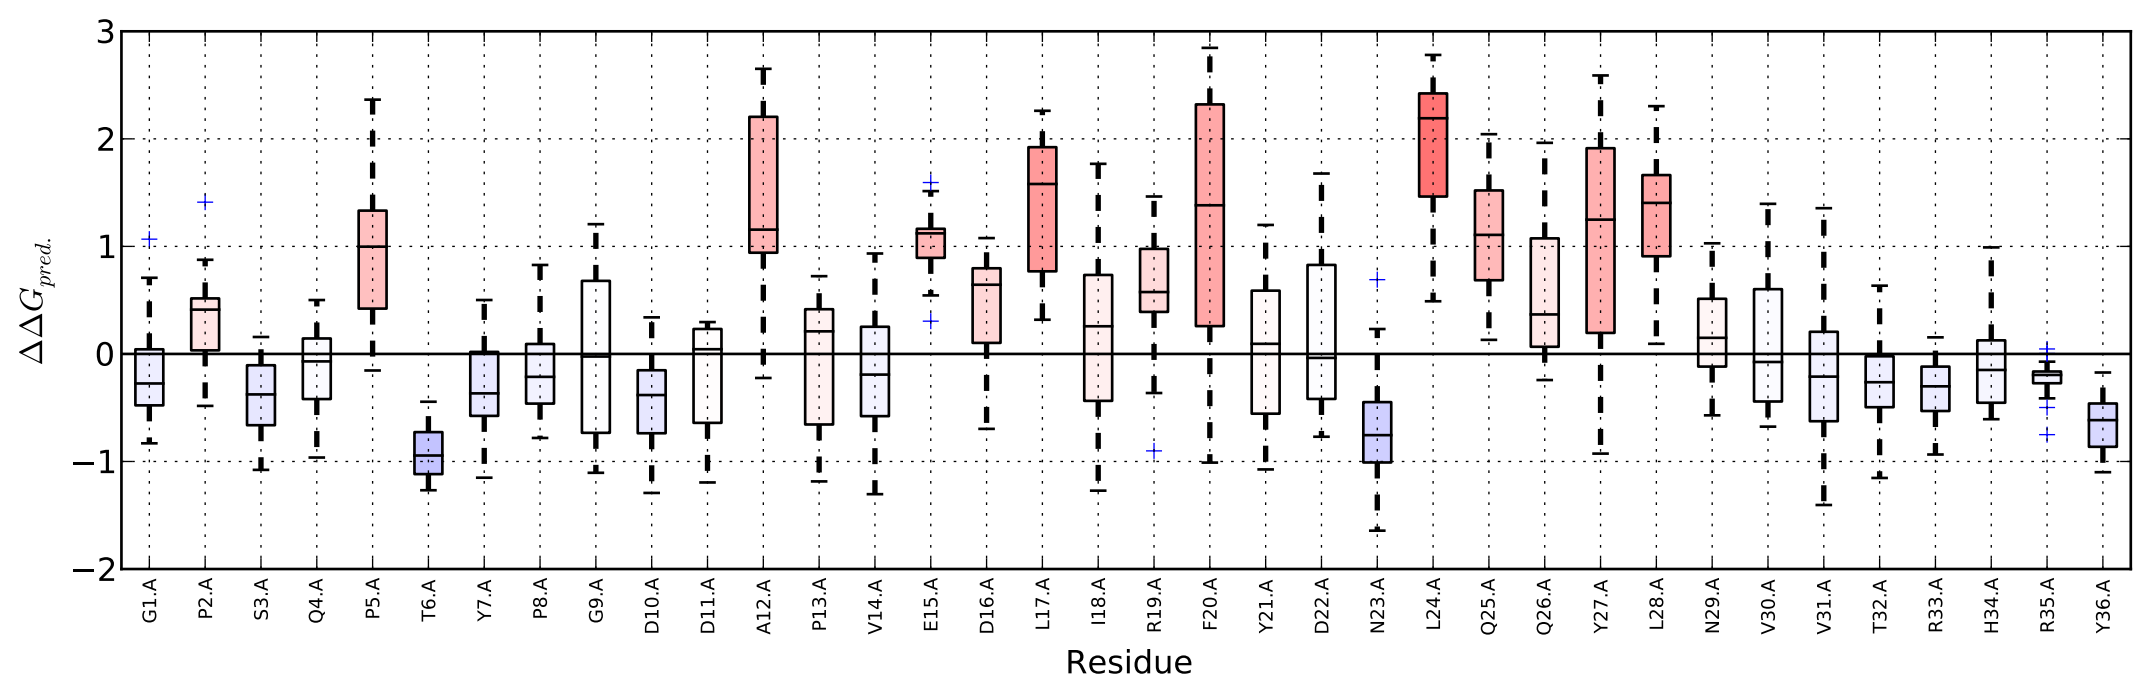



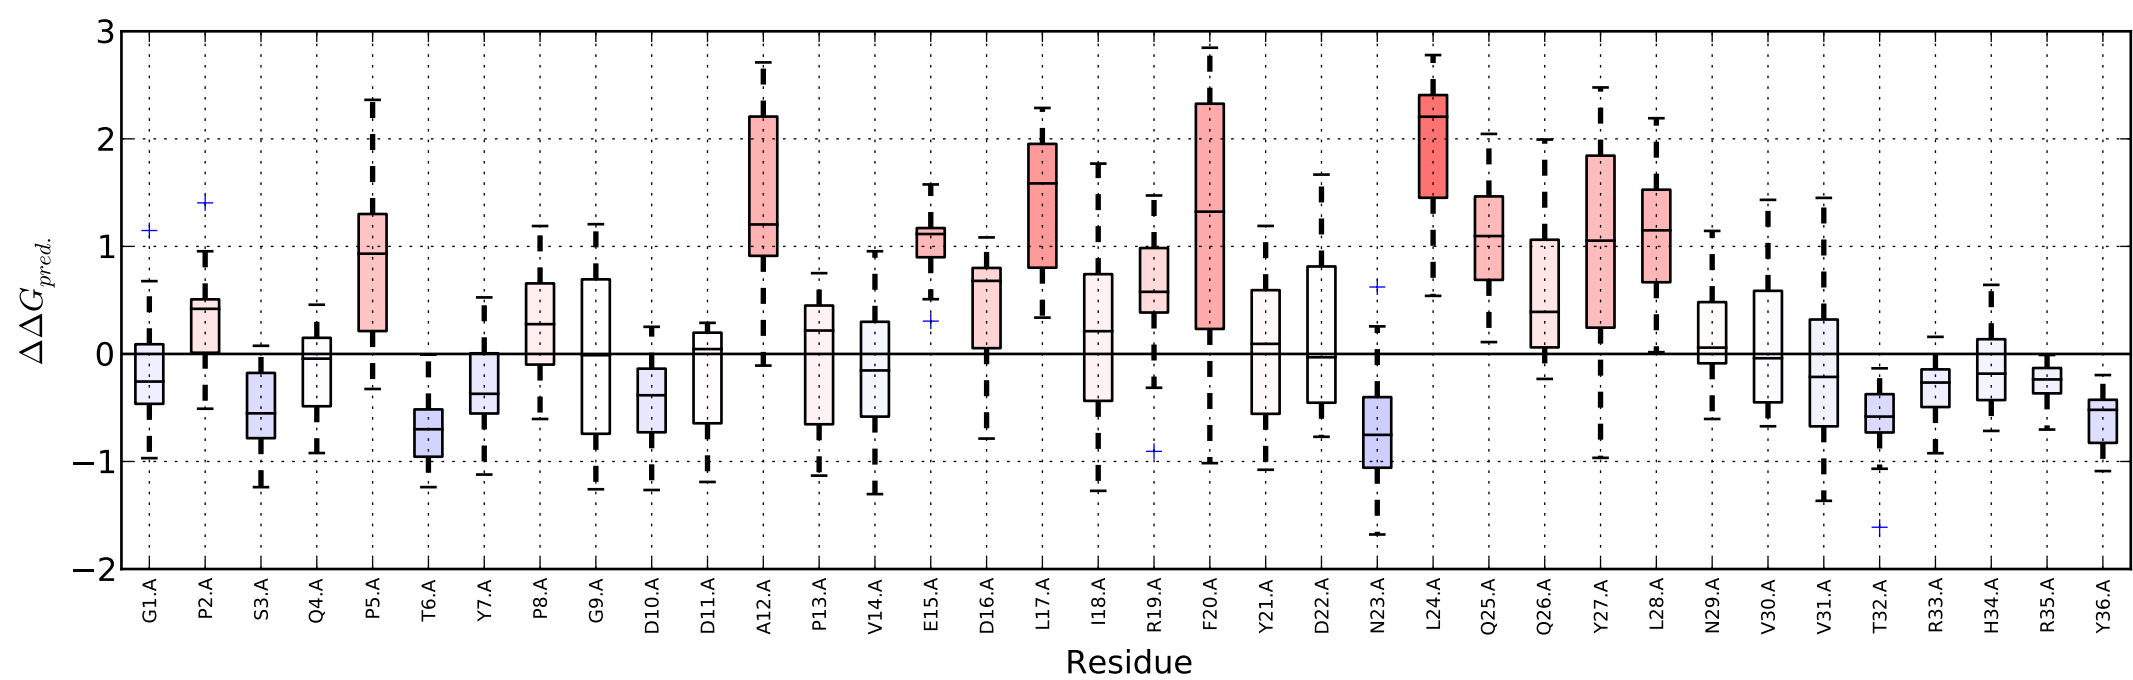

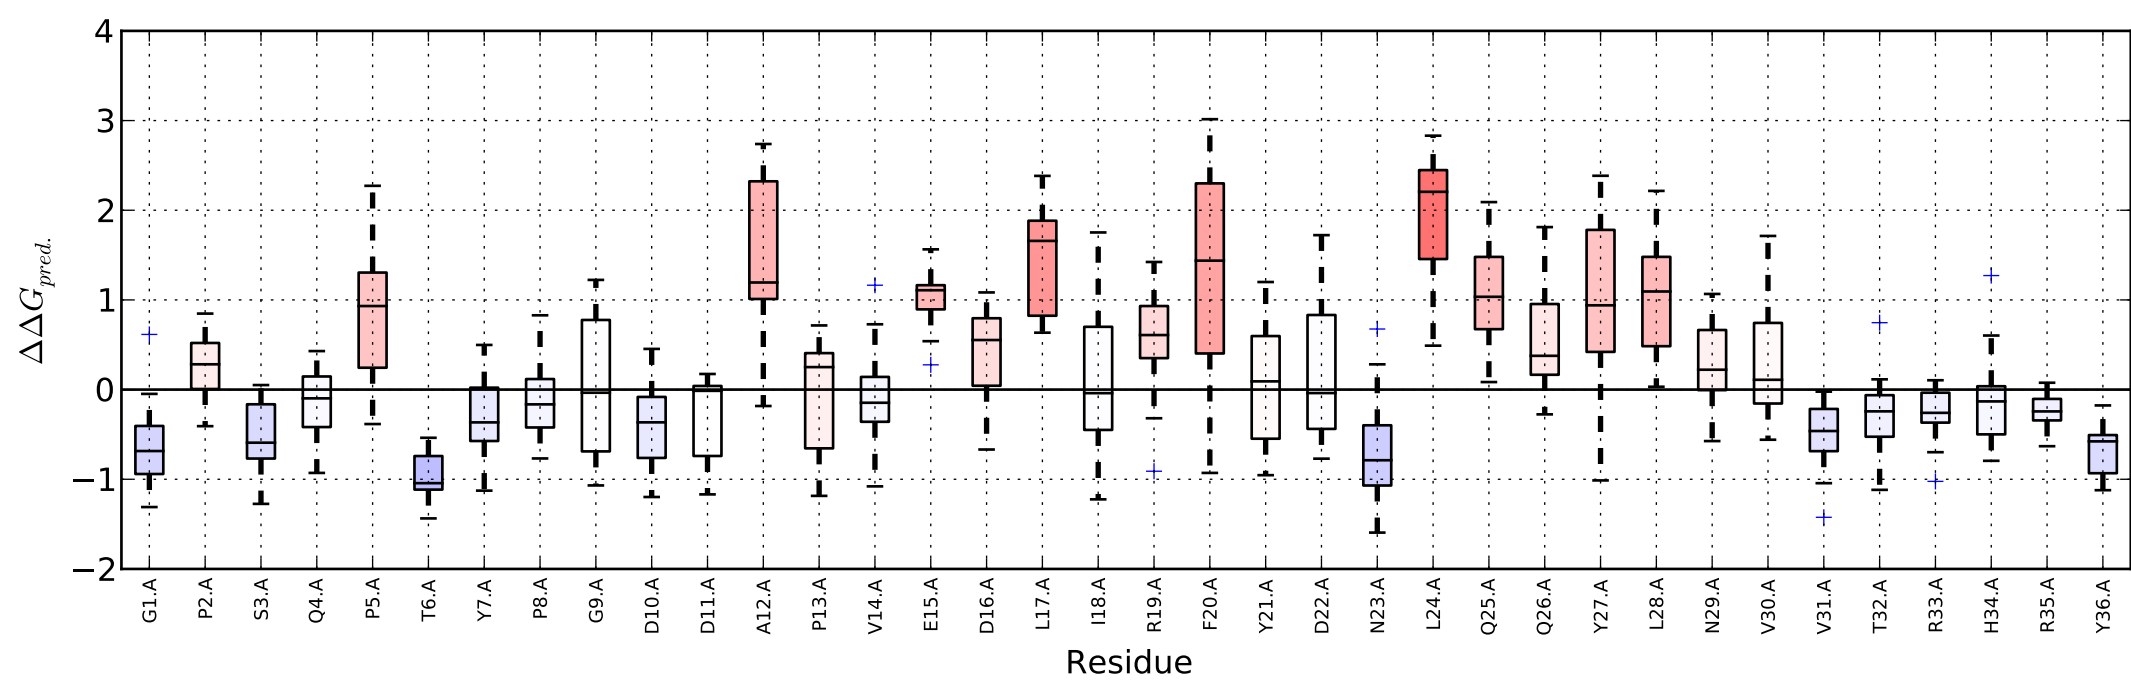

Supplement: Supplementary file 4 [file supplementary]

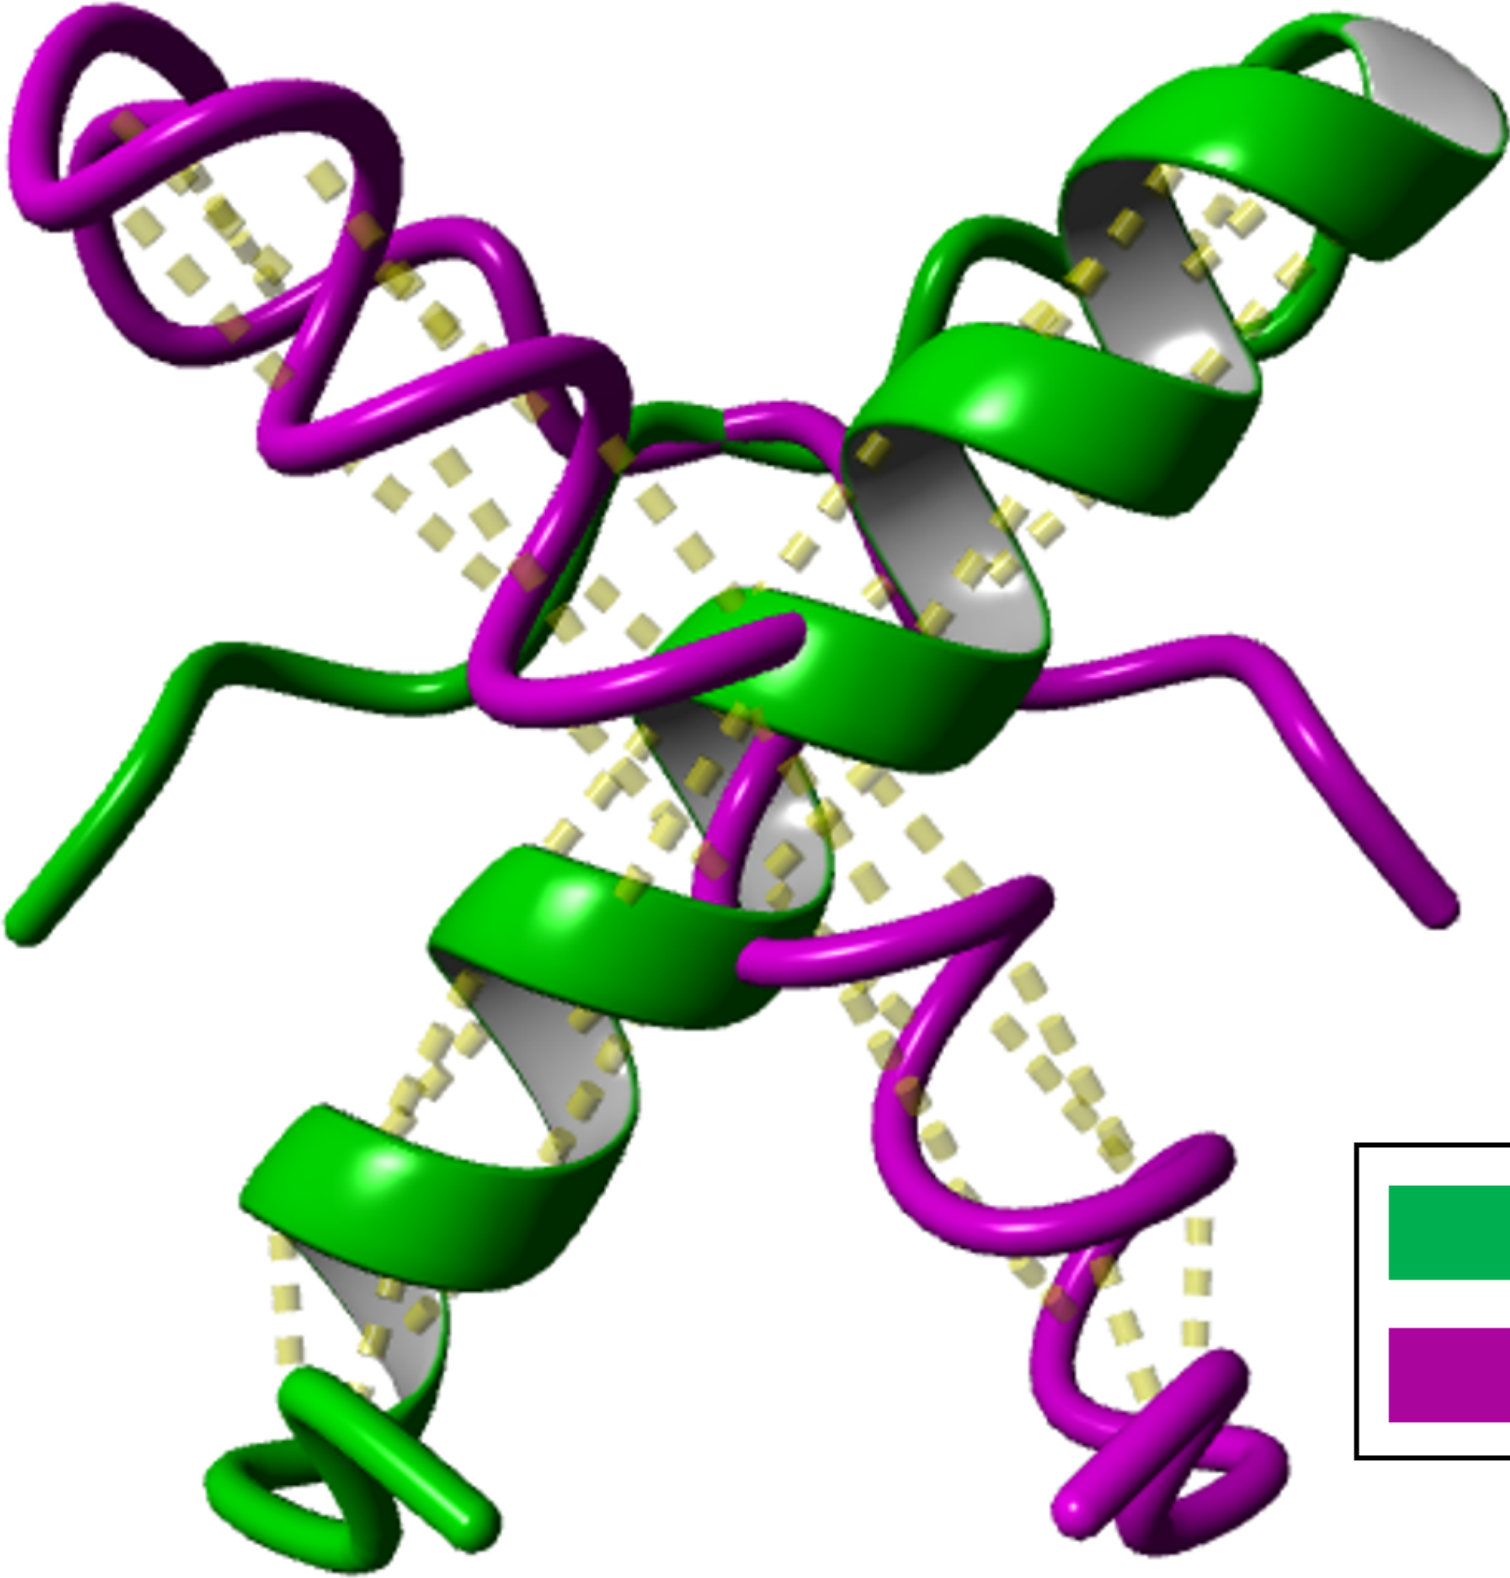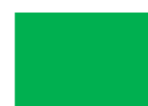

All L-1PPT

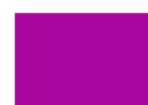

All D-1ppt

Supplement: Supplementary file 5 [file supplementary]

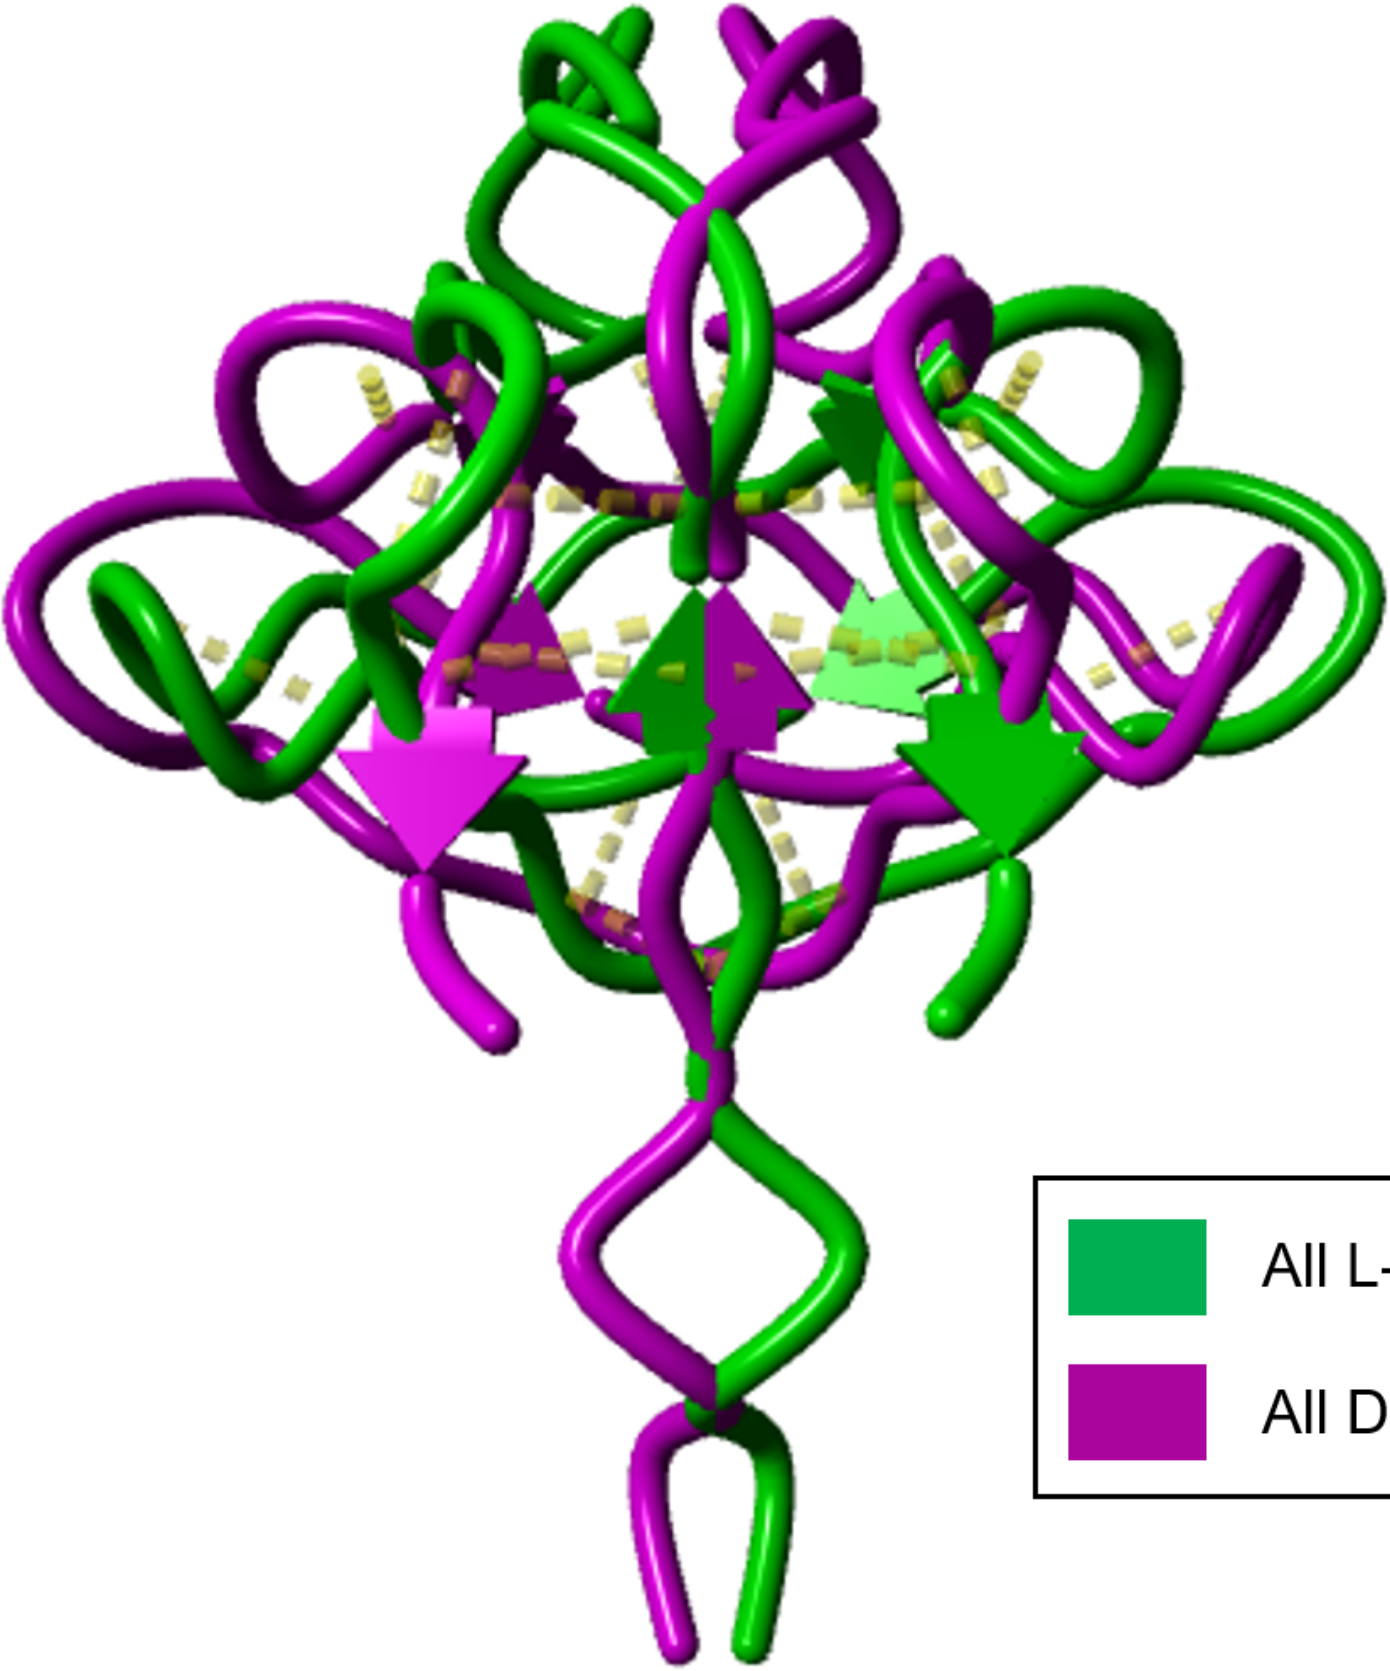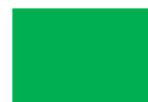

All L-1ARK

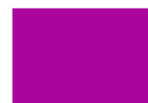

All D-1ark

Supplement: Supplementary file 6 [file supplementary]

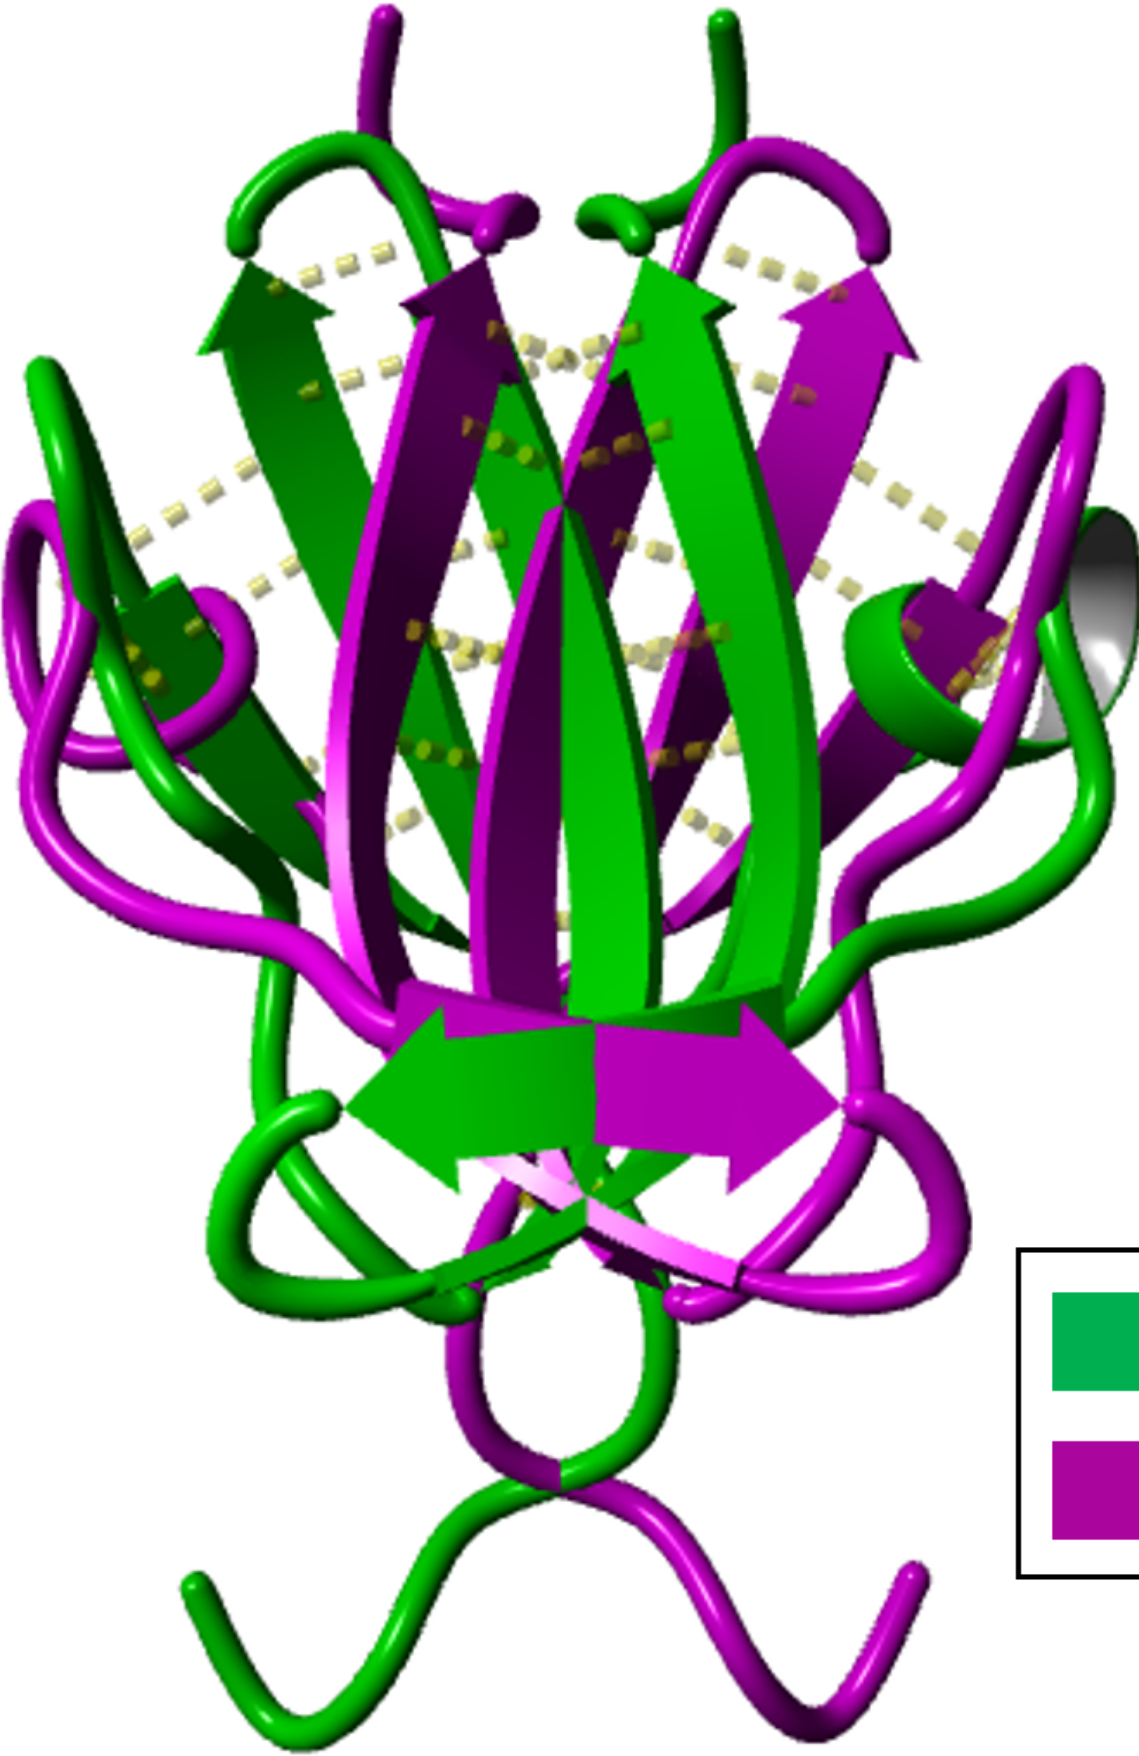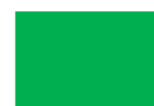

All L-1ZFI

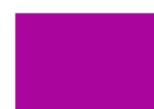

All D-1zfi

Supplement: Supplementary file 7 [file supplementary]
